# Supplementary material
Source: publisher figshare collection journal article supplement (https://tandf.figshare.com/ndownloader/files/12462107)
Supplement: Supplementary file 1 [file 12462107]

**Modified *Riemschneider* reaction as a new route for the synthesis of coumarinyl and 1-aza coumarinyl thioethers**

**Netravati Khanapurmatha, Manohar V. Kulkarnia* and G. N. Anilkumarb.**

a*Department of Studies in Chemistry, Karanatak University, Pavate Nagar, Dharwad-580003, Karnataka, India.*

b*Department of Physics, M.S. Ramaiah Institute of Technology, MSRIT post, MSR Nagar, Bangalore-560054, Karnataka, India.*

* *Corresponding author; email-id:* [*manohar274@gmail.com*](mailto:manohar274@gmail.com) (Manohar V. Kulkarni)

Supporting Information

**Contents:**

1. Variuos spectra of compounds **4a-4n** (1H NMR, 13C NMR, EI-MS and IR)

2. X-Ray data for compound **4h**

3. Fluorescence measurements

**
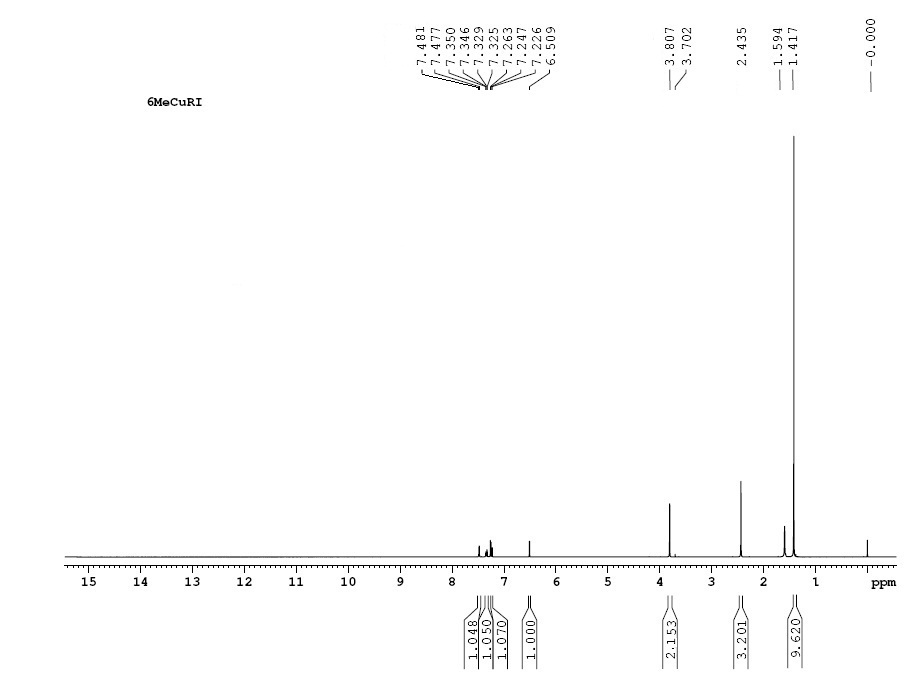
1H NMR, 13C NMR, EI-MS and IR-
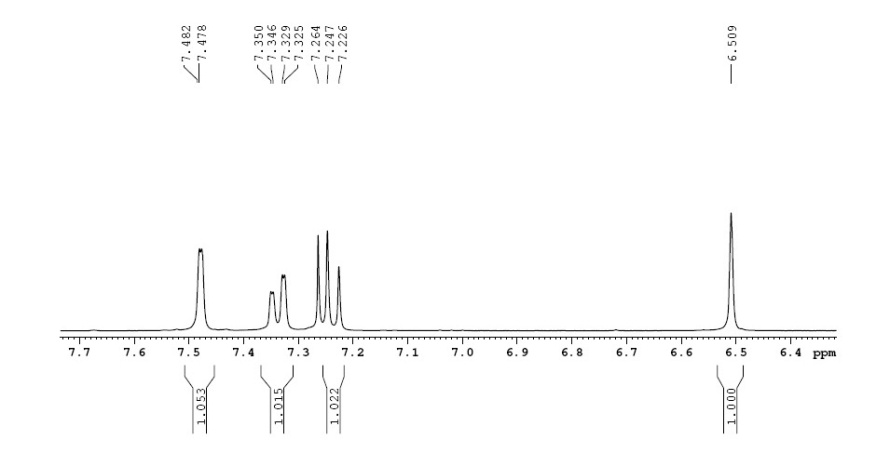
spectra of Compounds 4a-4n**

1H NMR of compound **4a**


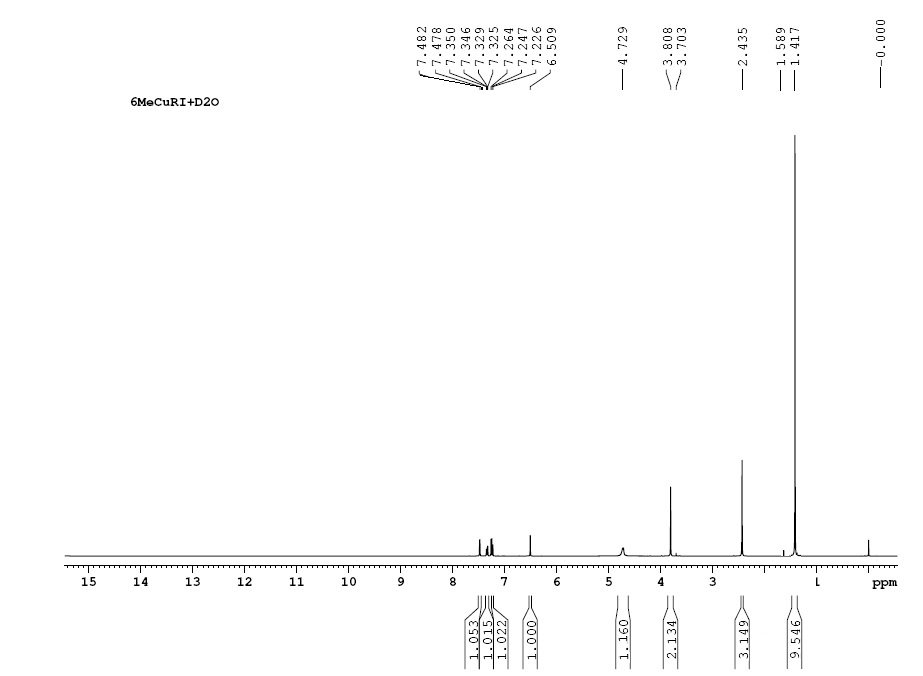


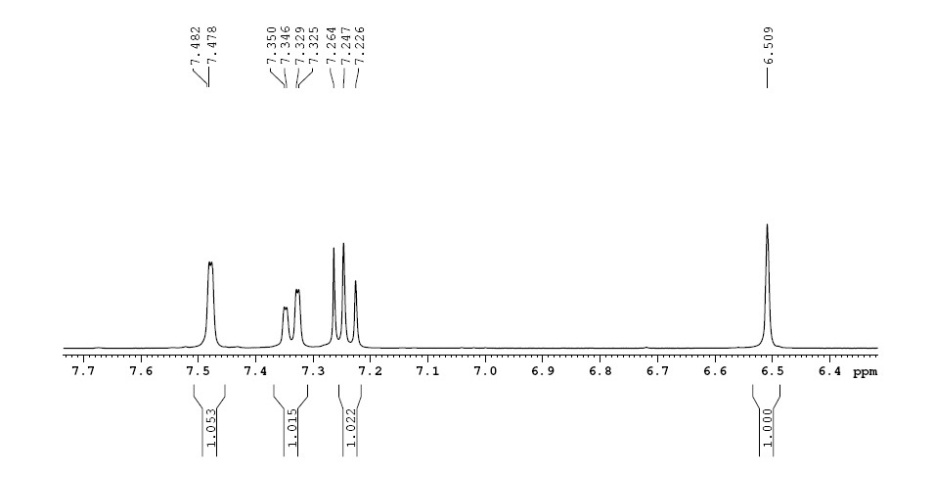


D2O exchange study of **4a**


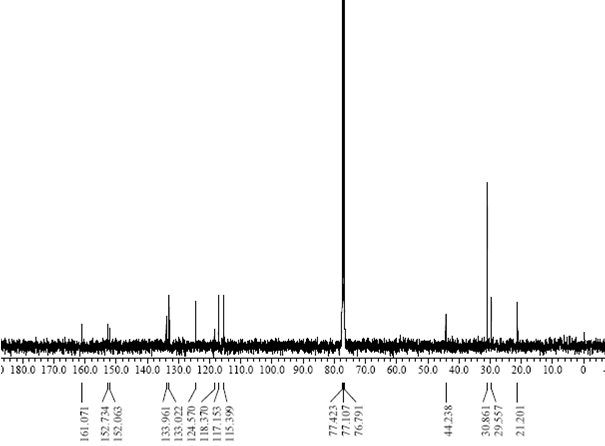


13C NMR of compound **4a**


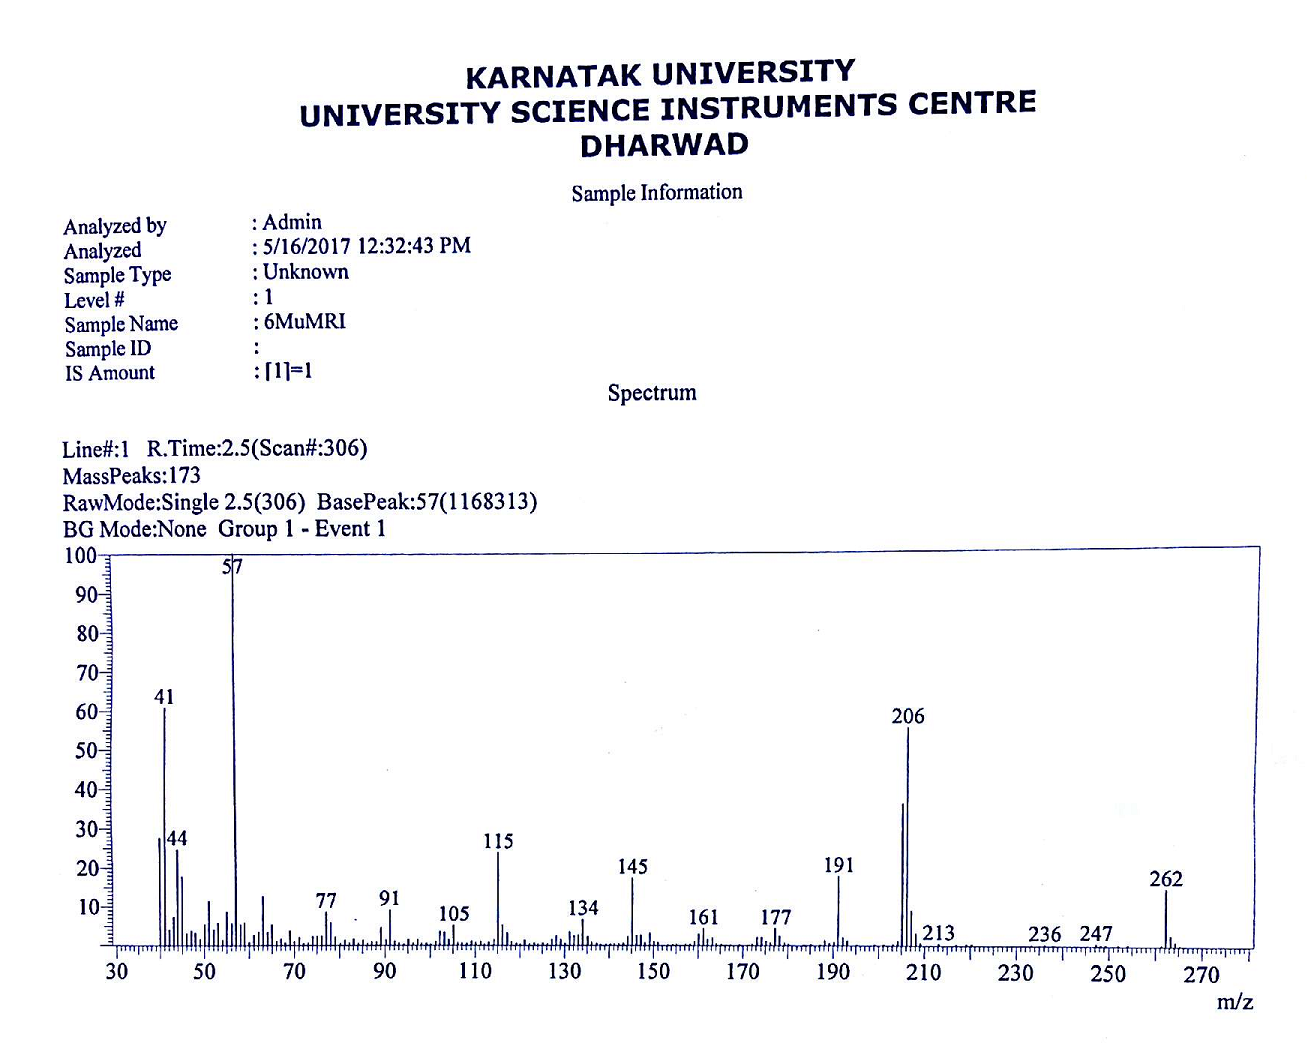
EI-MS of compound **4a**


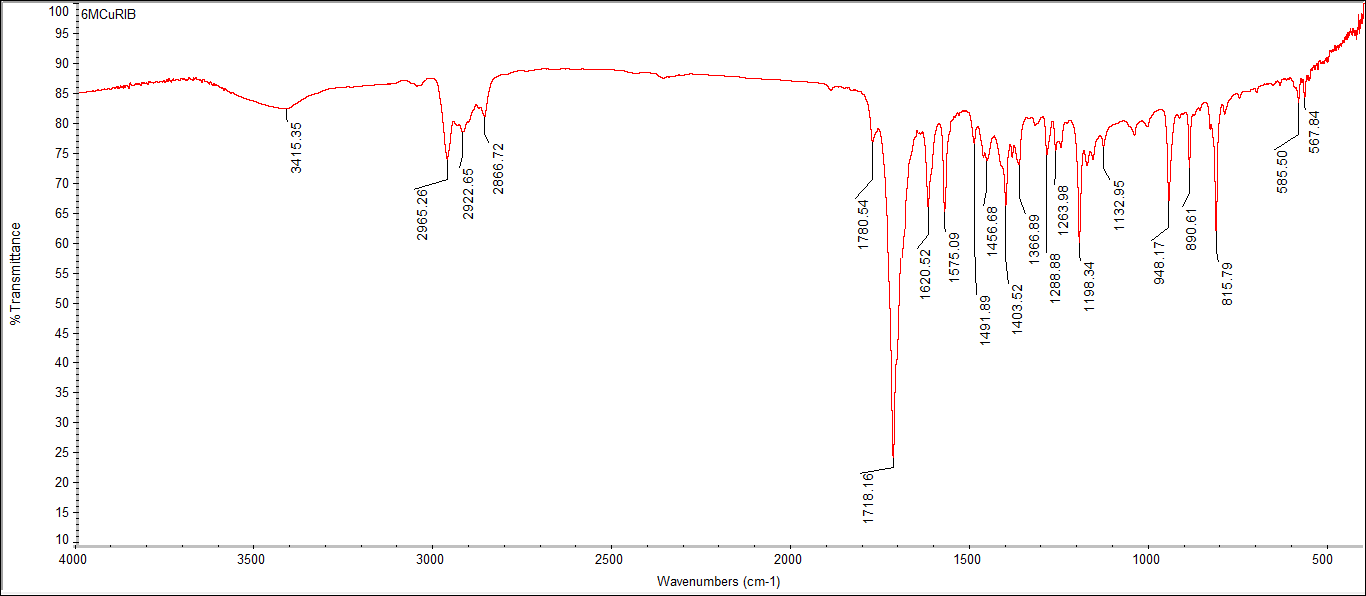


FT-IR of compound **4a**


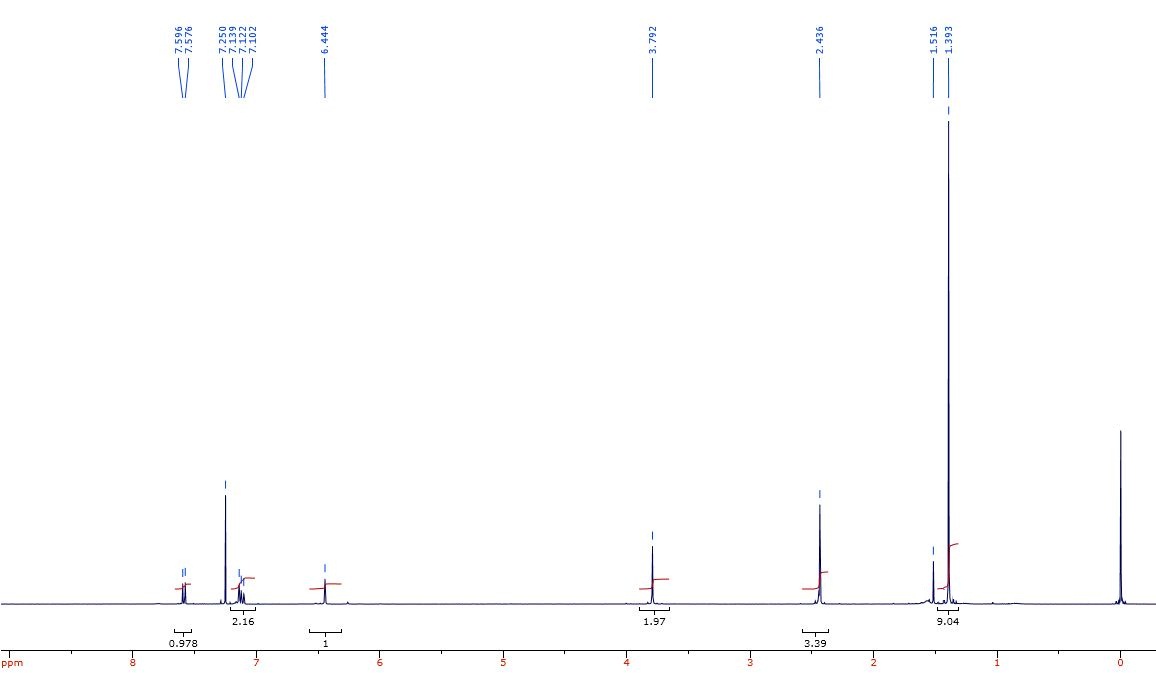


1H NMR of compound **4b**

13C NMR of compound **4b**


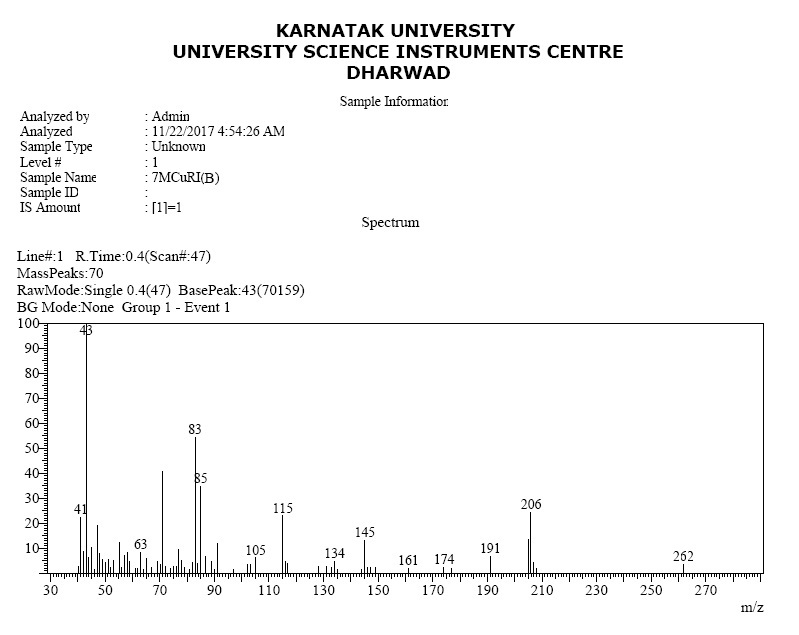
EI-MS of compound **4b**


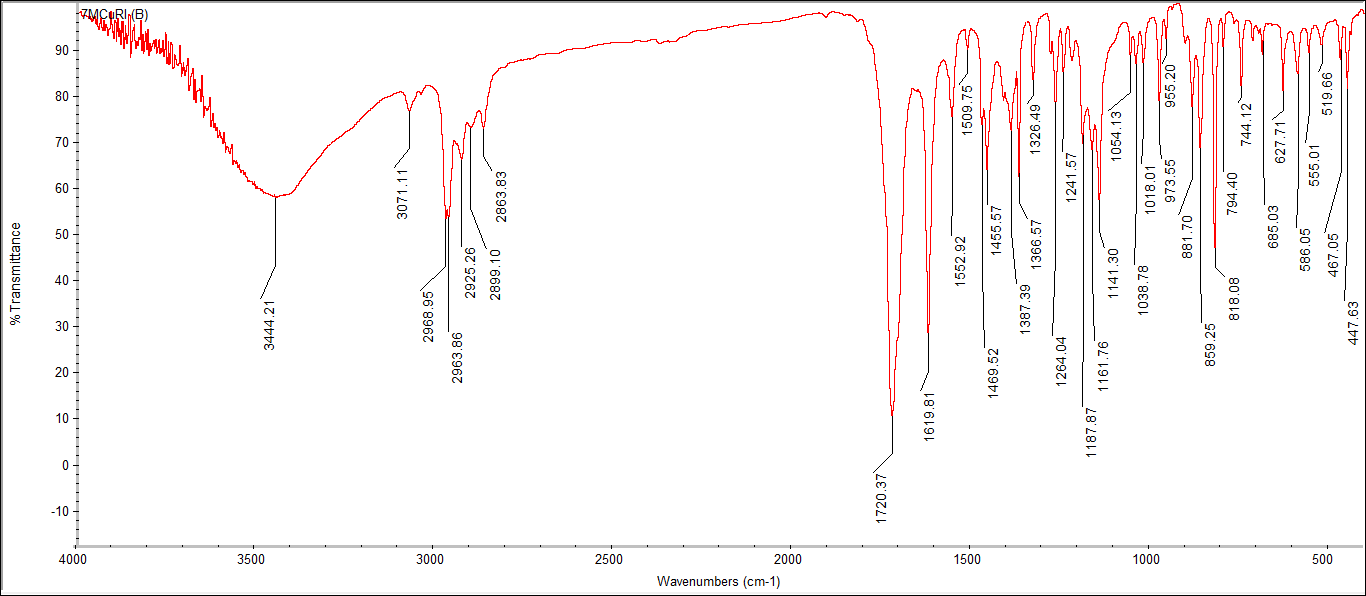
FT-IR of compound **4b**

1H NMR of compound
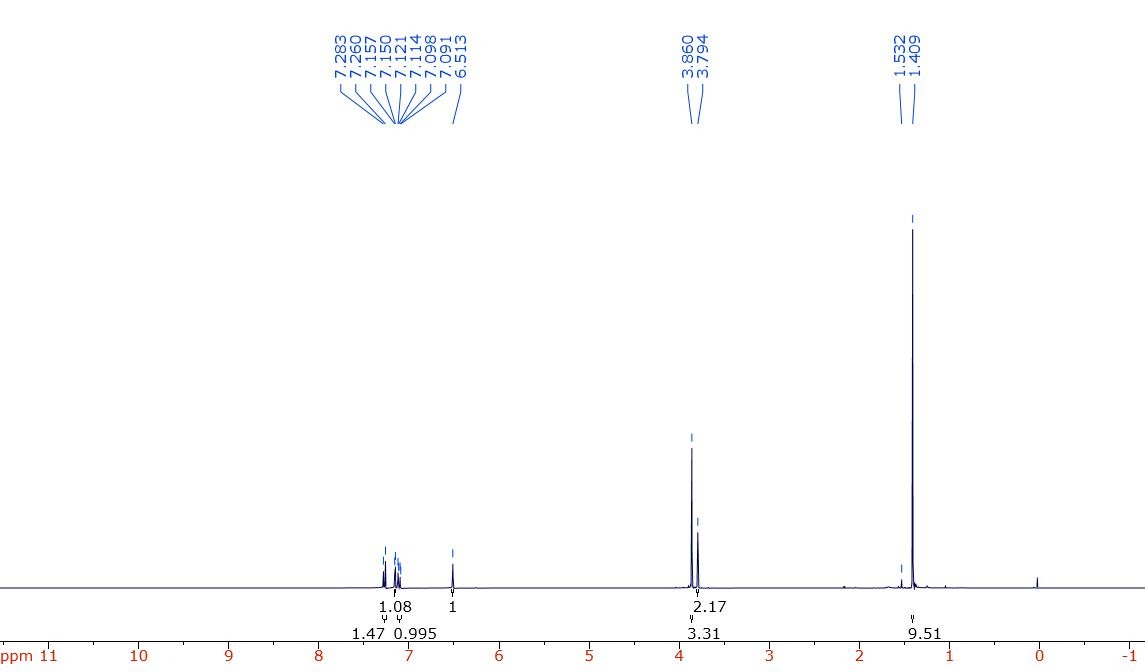
**4c**

13C NMR of compound **4c**

EI-MS of compound **4c**

FT-IR of compound
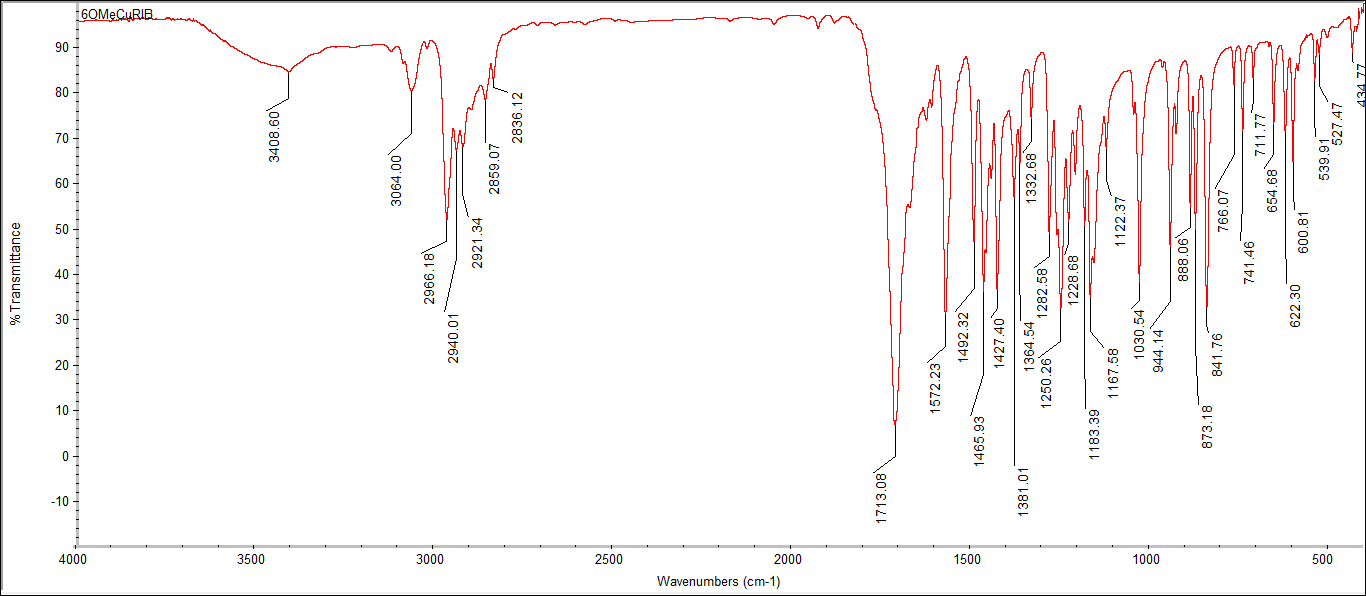
**4c**


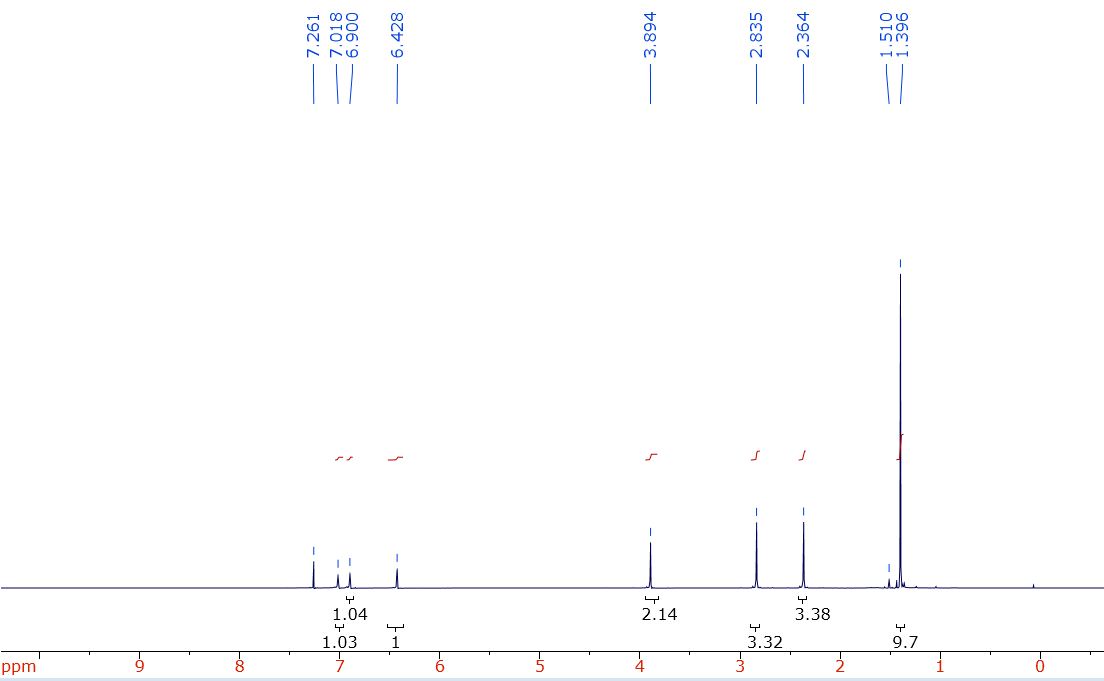


1H NMR of compound **4d**

13C NMR of compound **4d**

EI-MS of compound **4d**


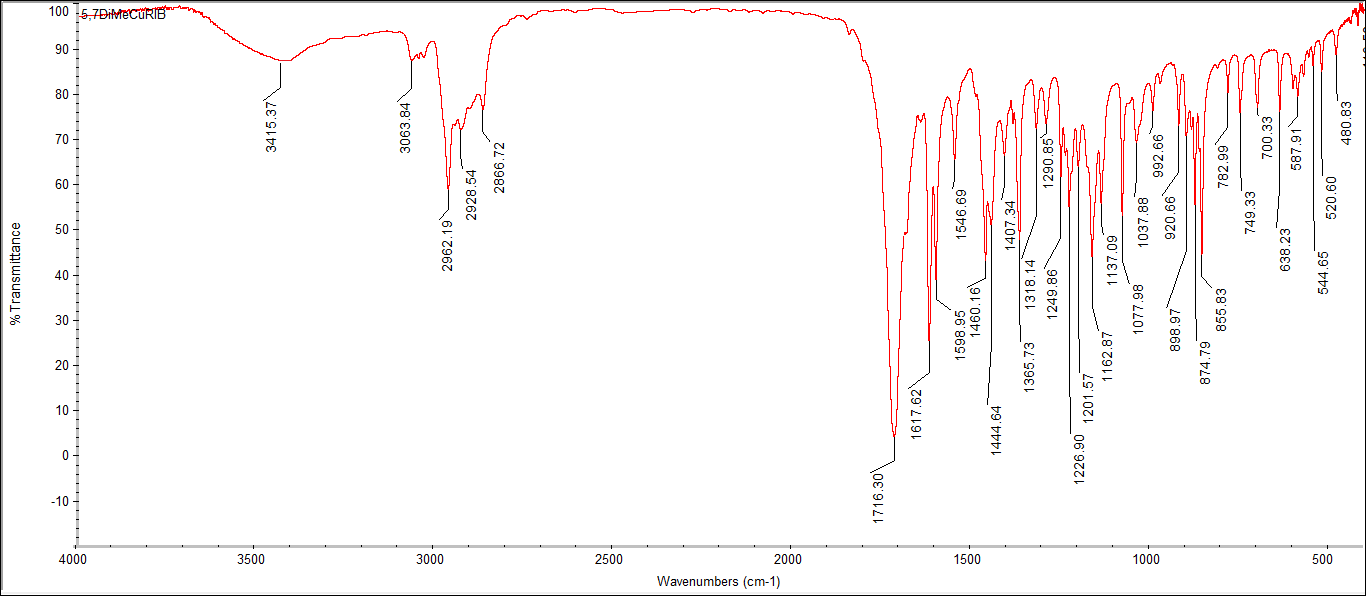


FT-IR of compound **4d**


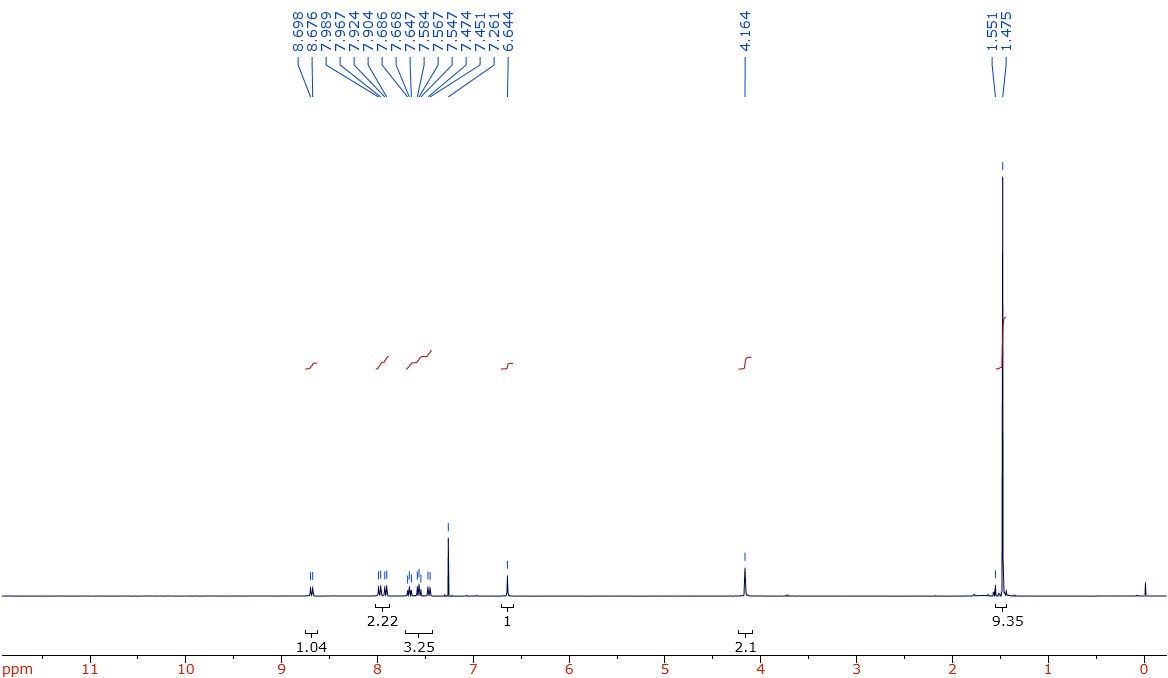


1H NMR of compound **4e**

13C NMR of compound **4e**


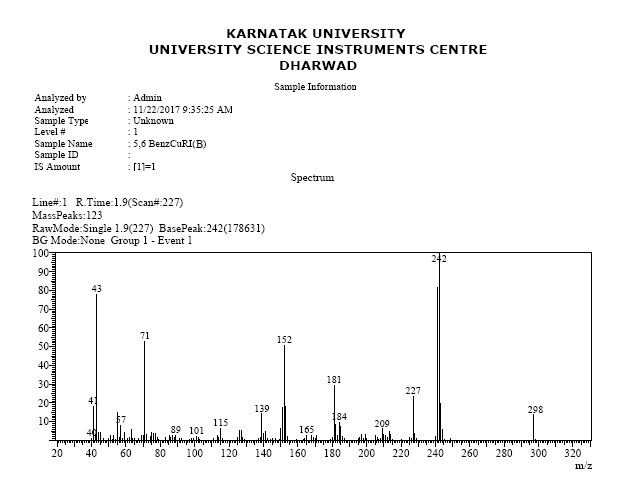
EI-MS of compound **4e**


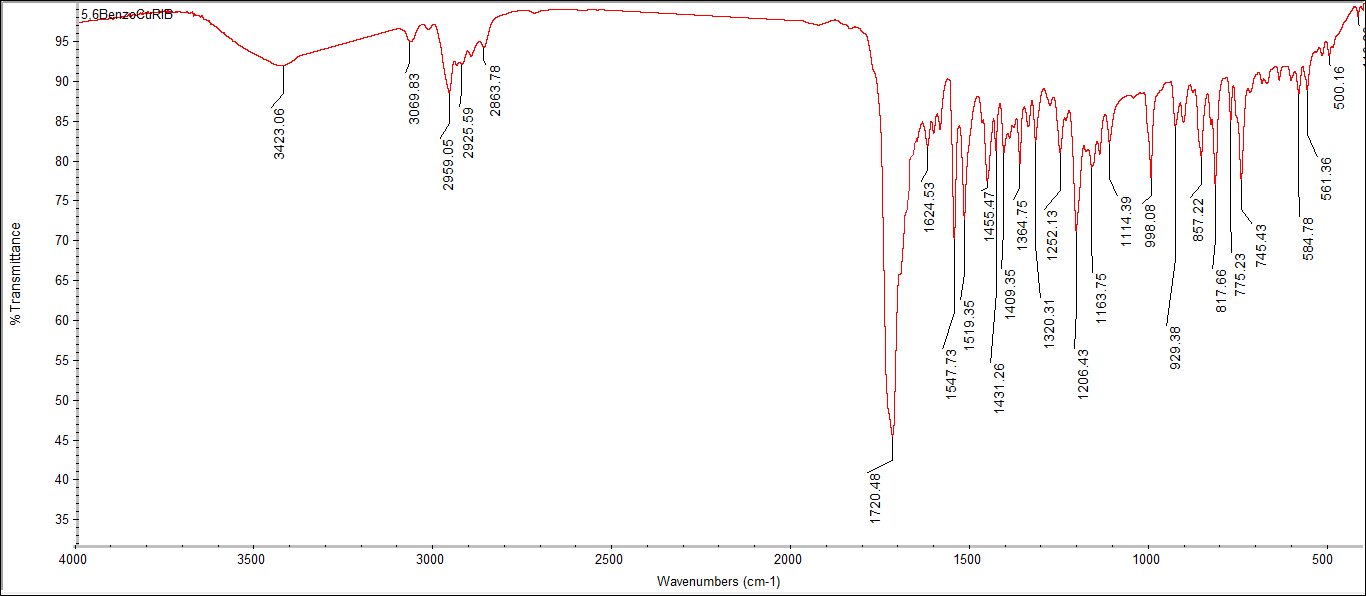


FT-IR of the compound **4e**


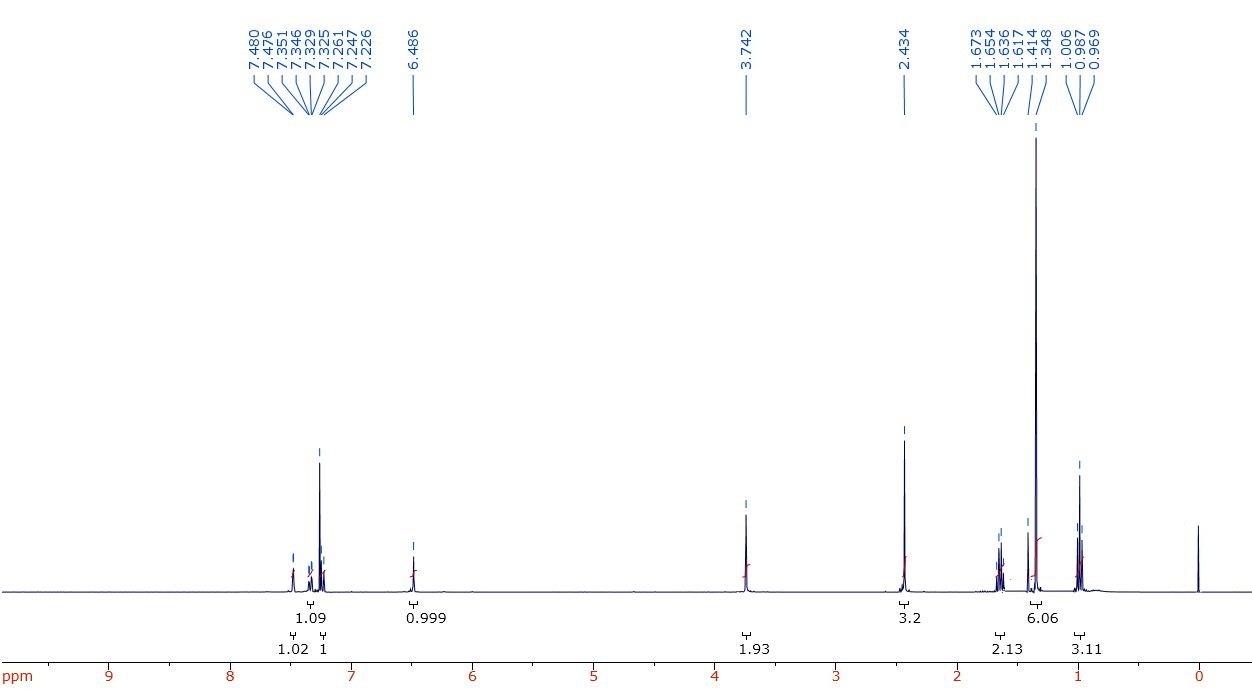


1H NMR of compound **4f**


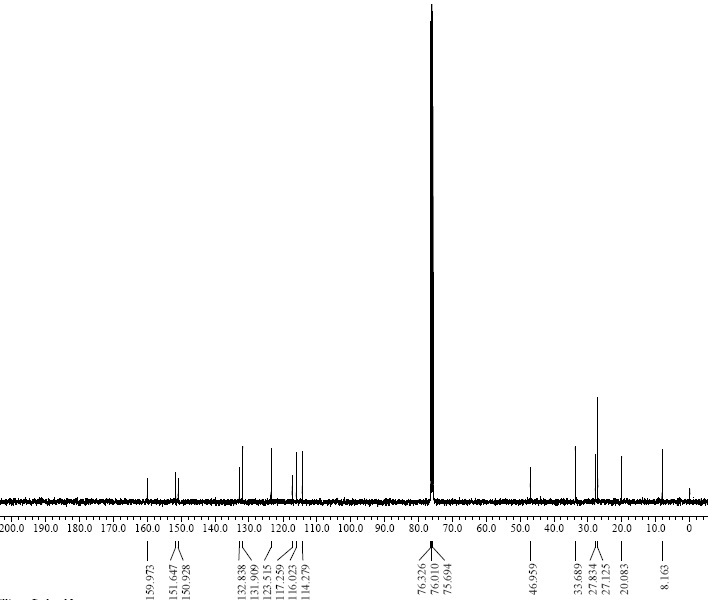


13C NMR of compound **4f**


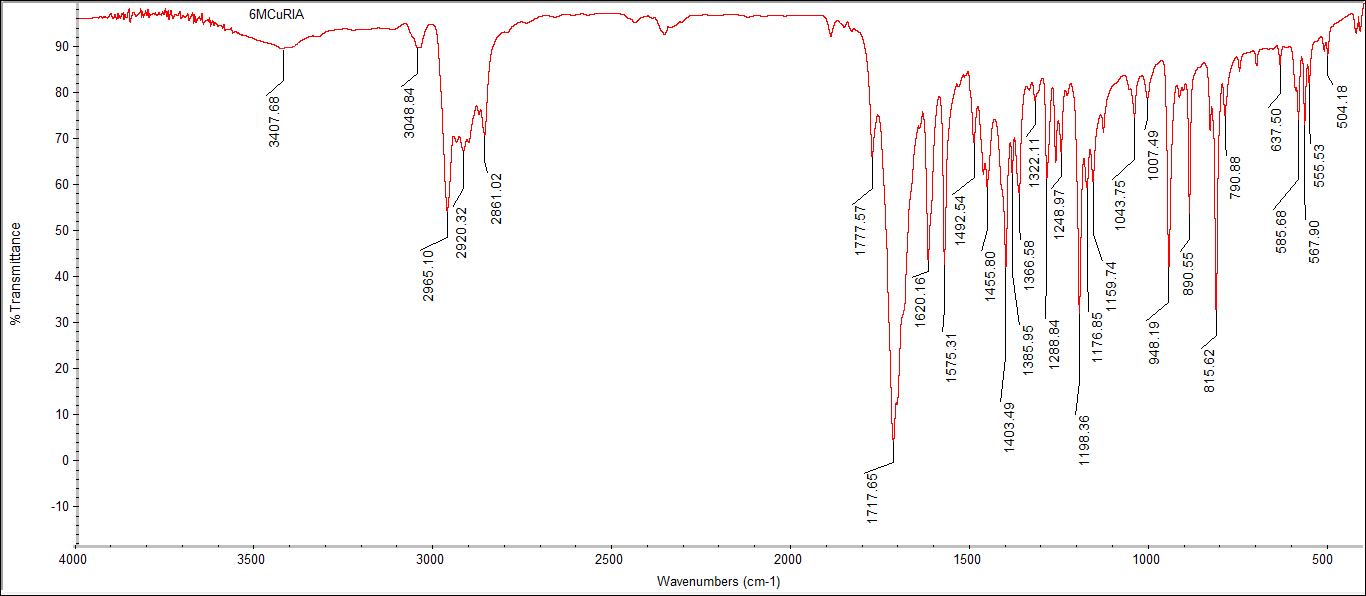
EI-MS of compound **4f**

FT-IR of the compound **4f**


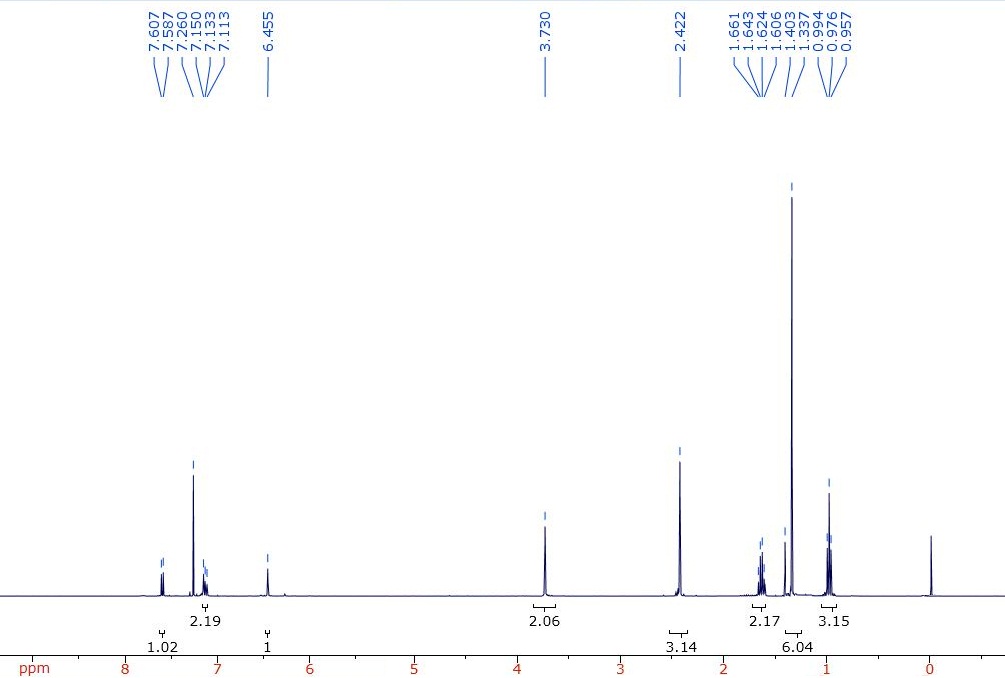


1H NMR of compound **4g**


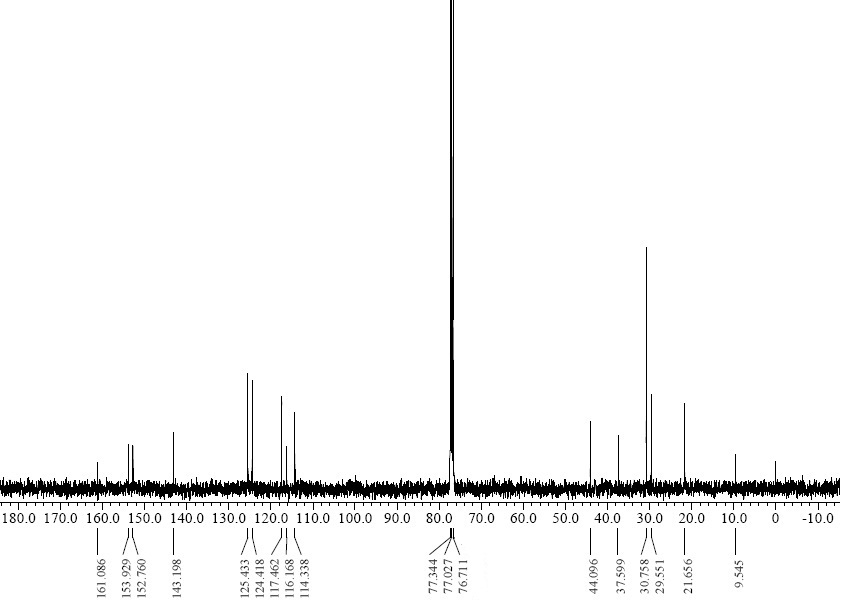
13C NMR of compound **4g**

EI-MS of compound **4g**


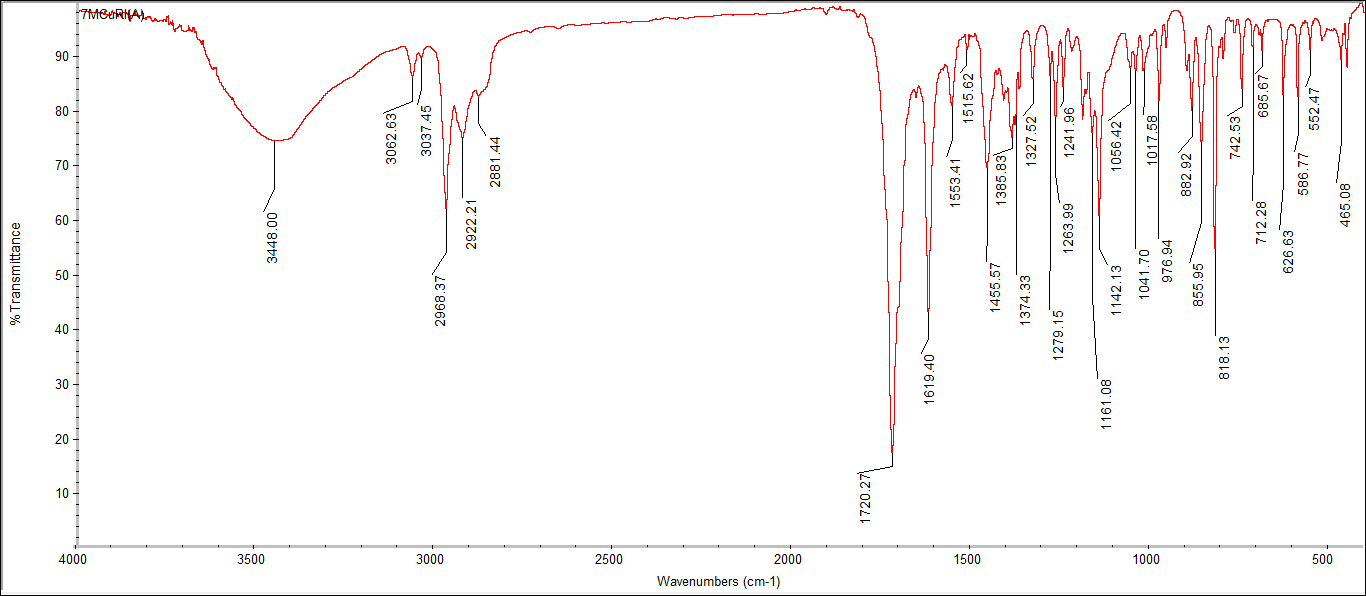


FT-IR of the compound **4g**


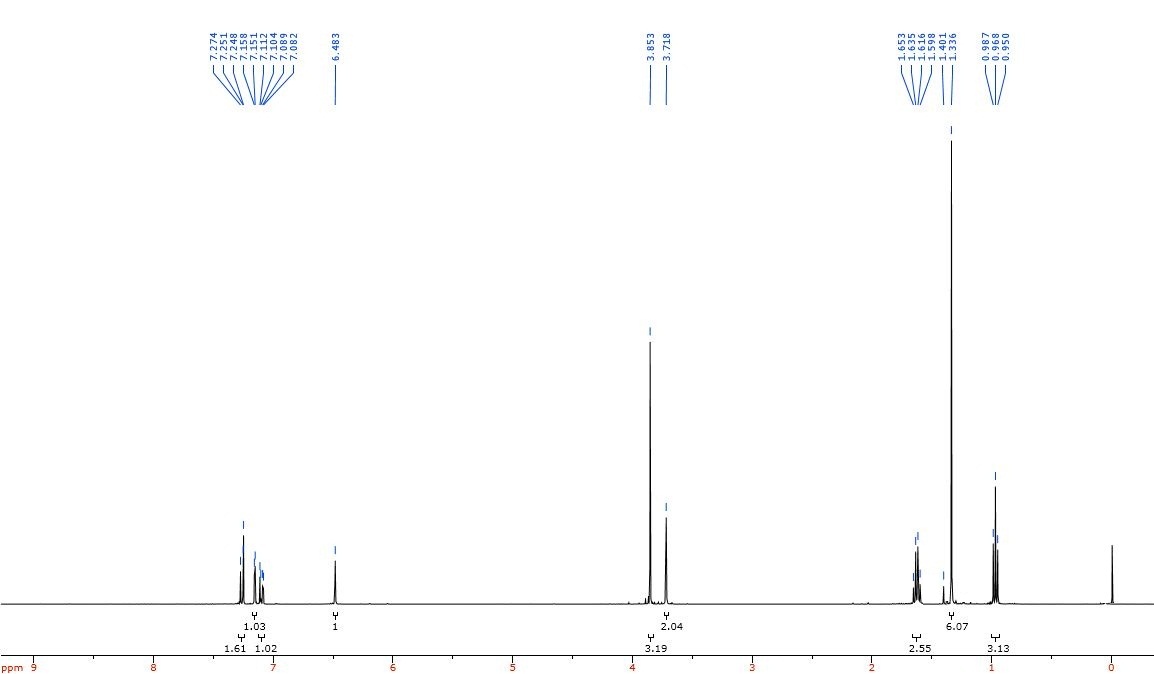


1H NMR of compound **4h**

13C NMR of compound **4h**


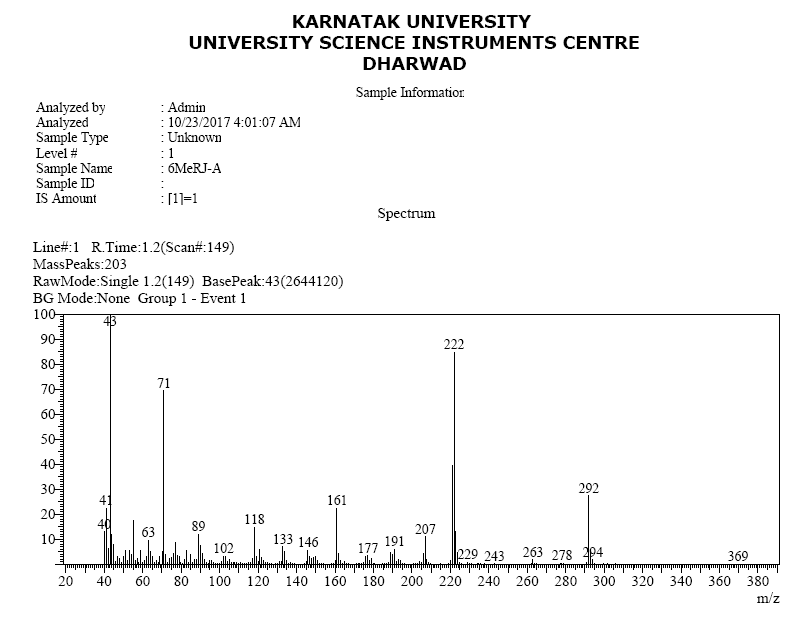


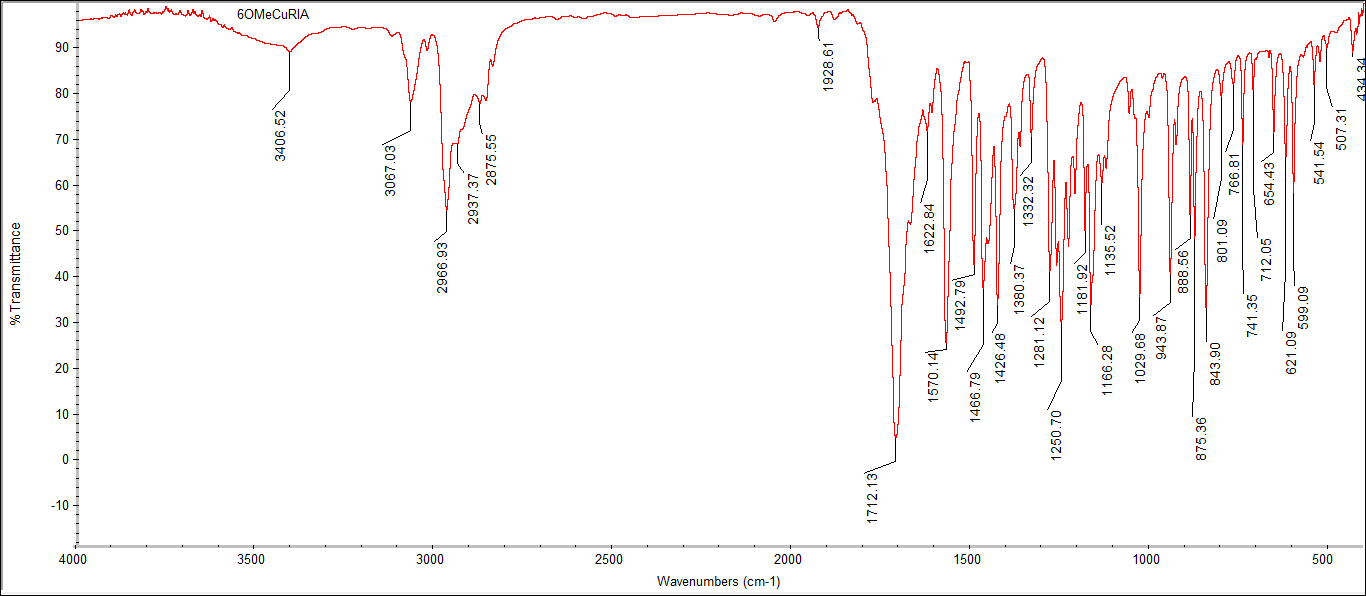
EI-MS of compound **4h**

FT-IR of the compound **4h**

**
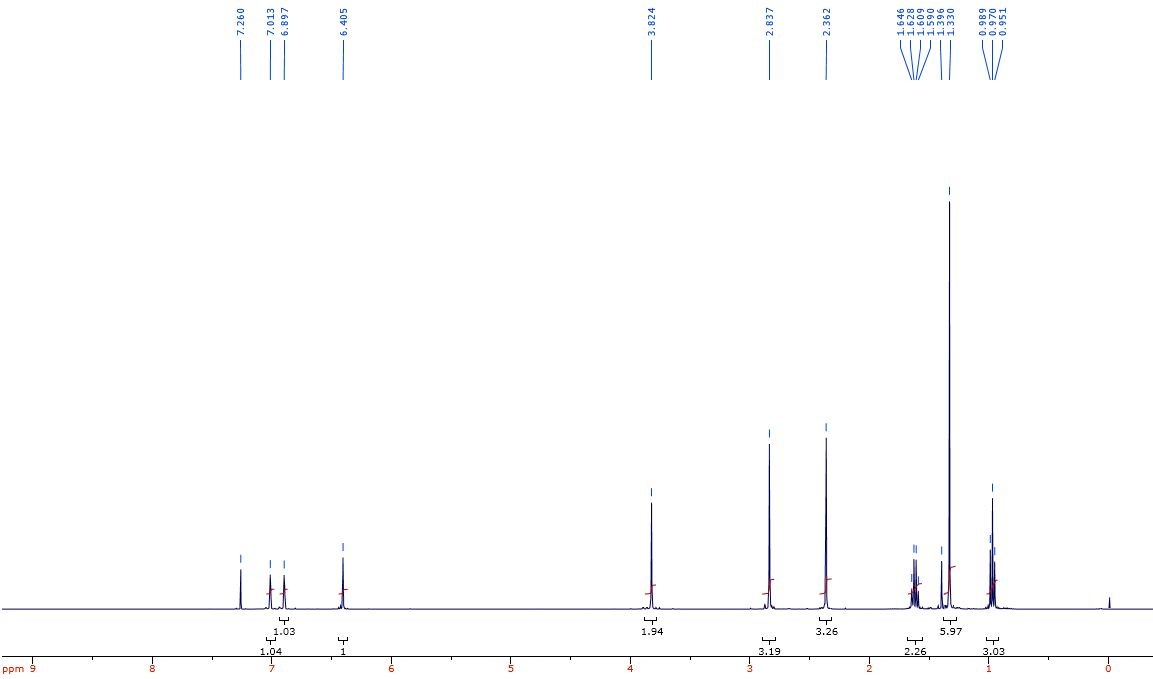
**

1H NMR of compound **4i**

13C NMR of compound **4i**

**
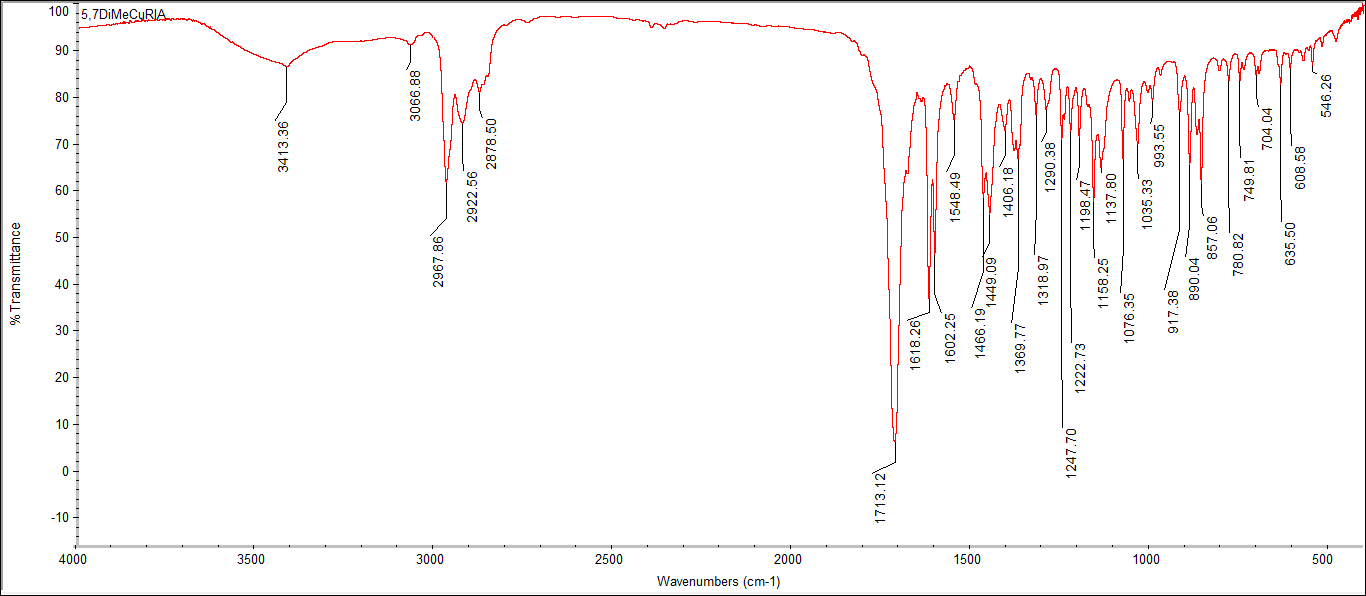
**EI-MS of compound **4i**

FT-IR of the compound **4i**


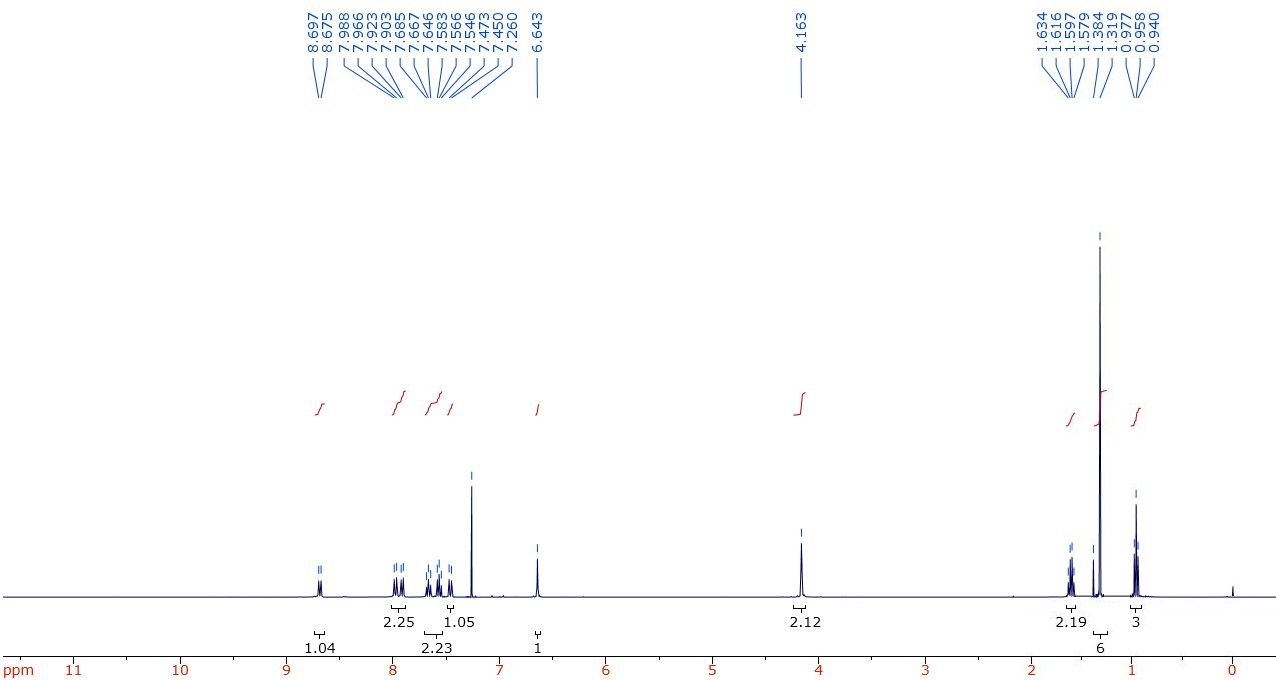


1H NMR of compound **4j**


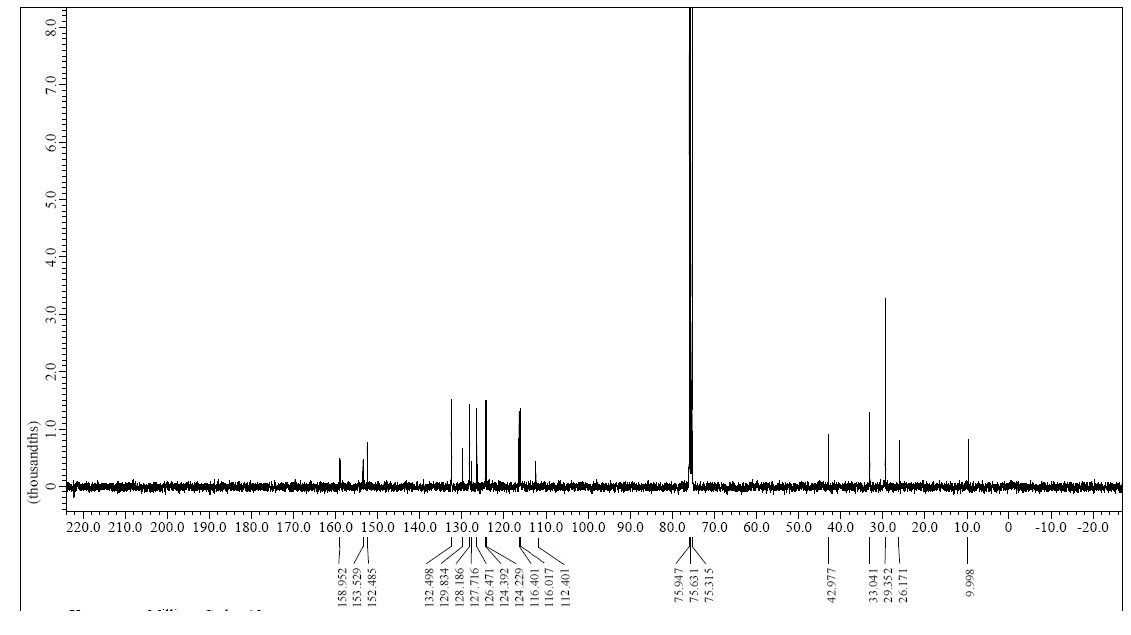


13C NMR of compound **4j**


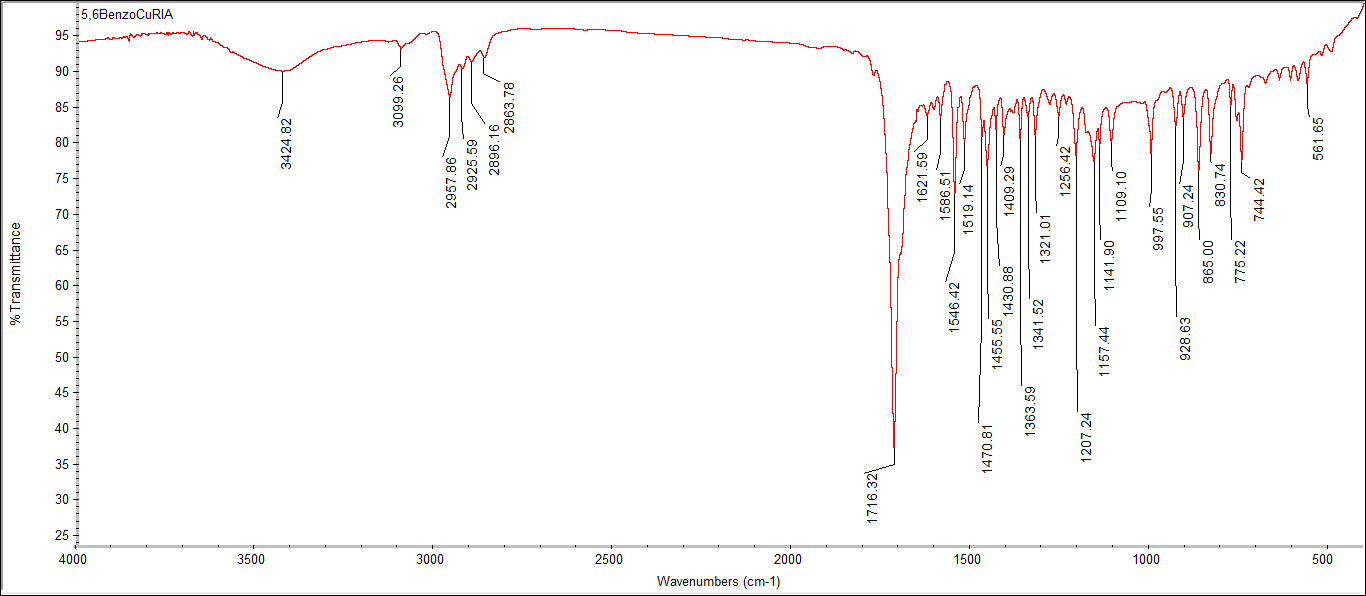
EI-MS of compound **4j**

FT-IR of the compound **4j**


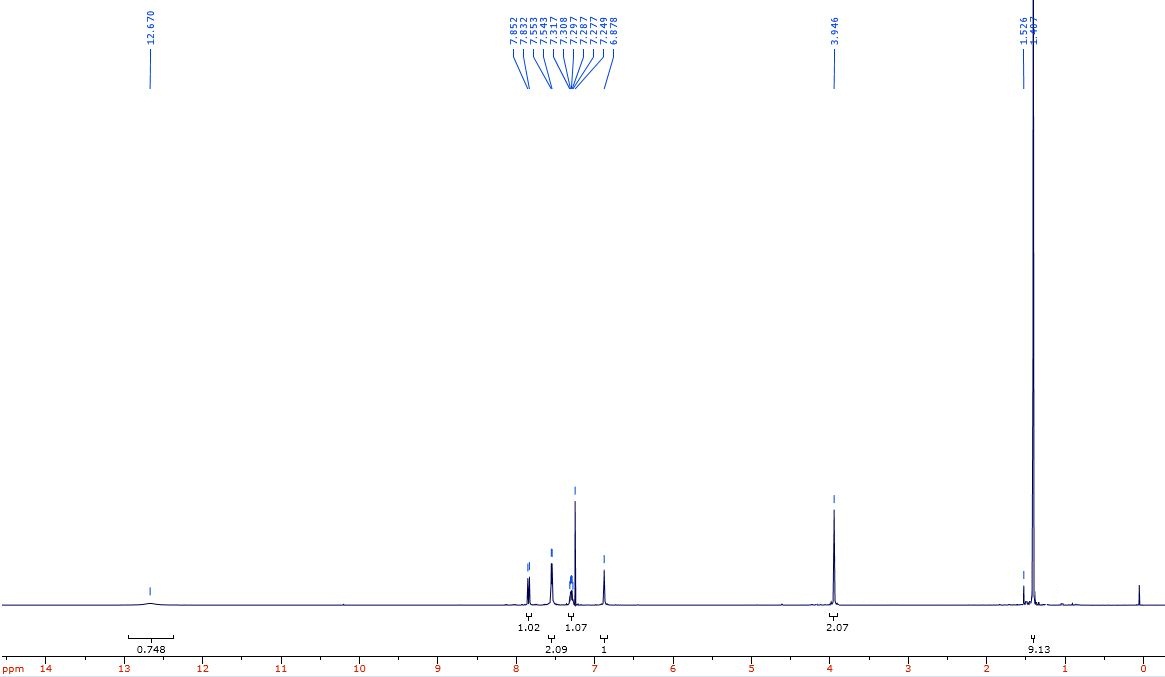


1H NMR of compound **4k**

13C NMR of compound
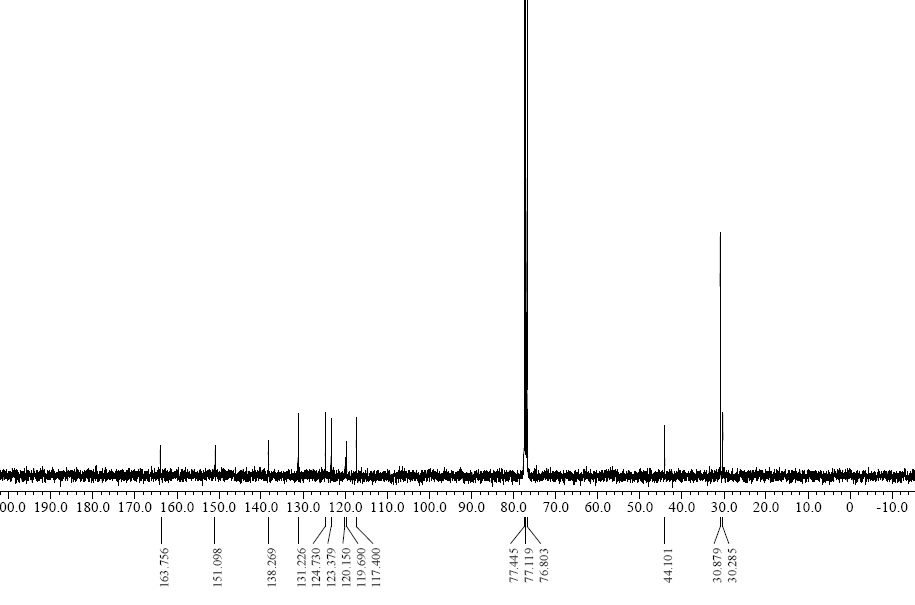
**4k**

EI-MS of compound **4k**


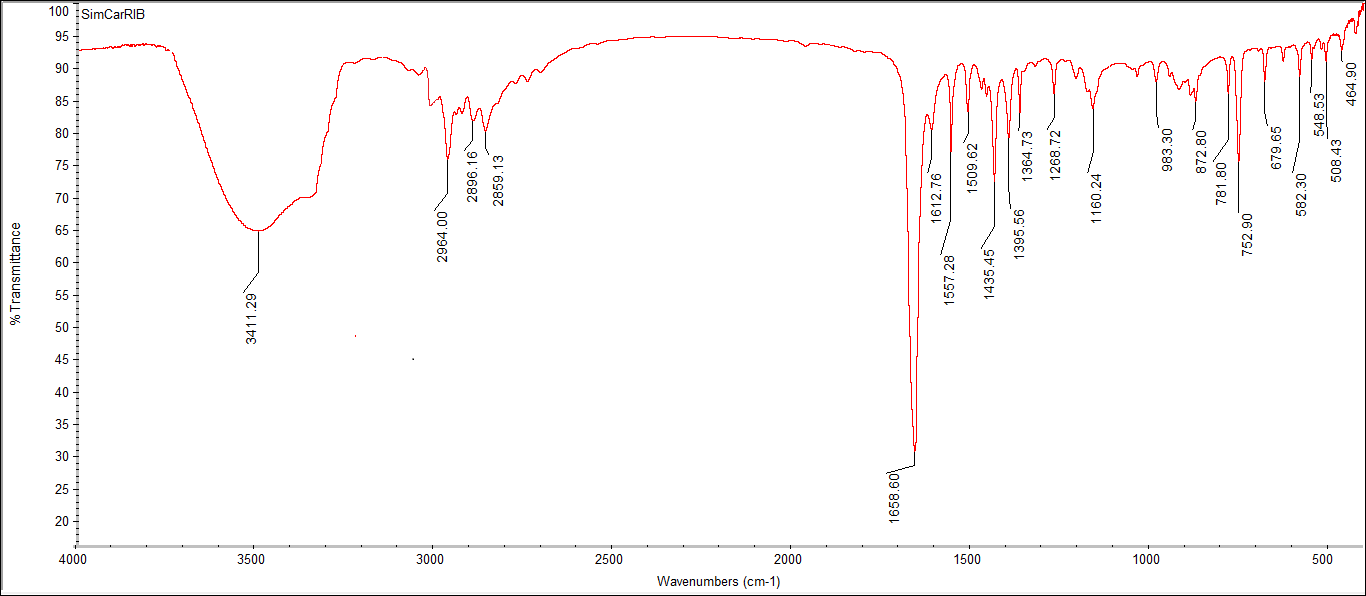
FT-IR of the compound **4k**


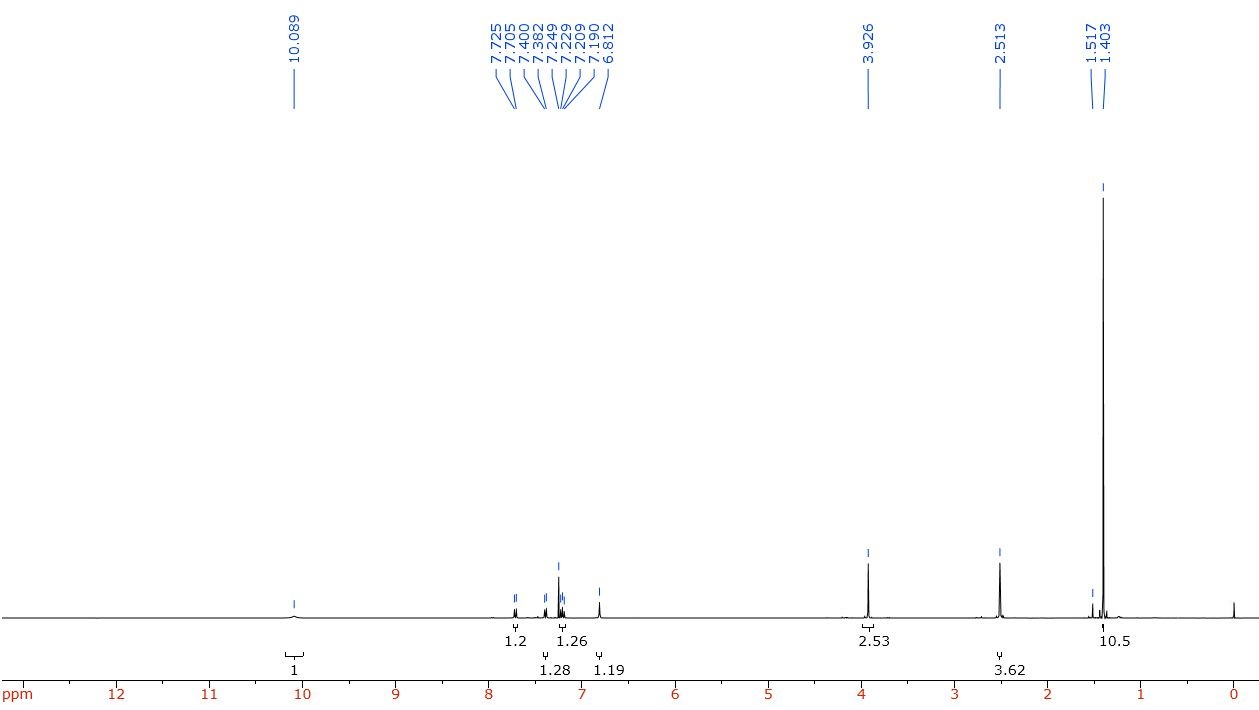


1H NMR of compound **4l**

13C NMR of compound **
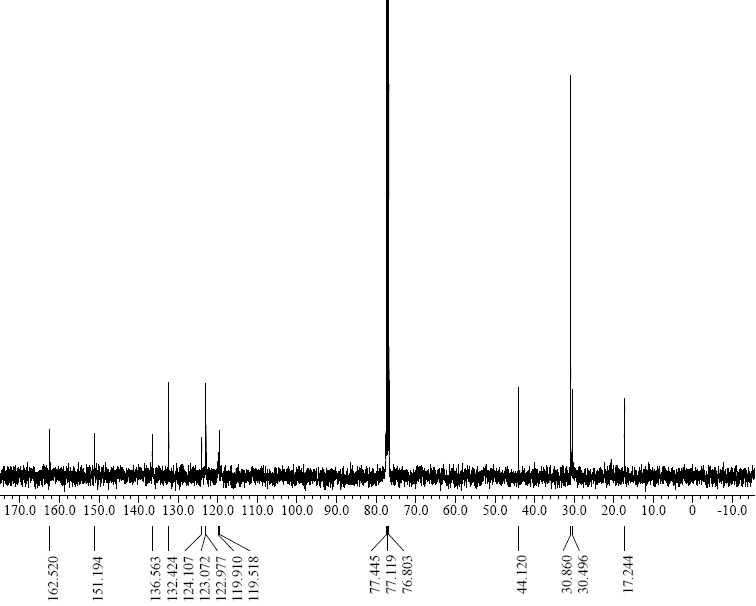
4l**


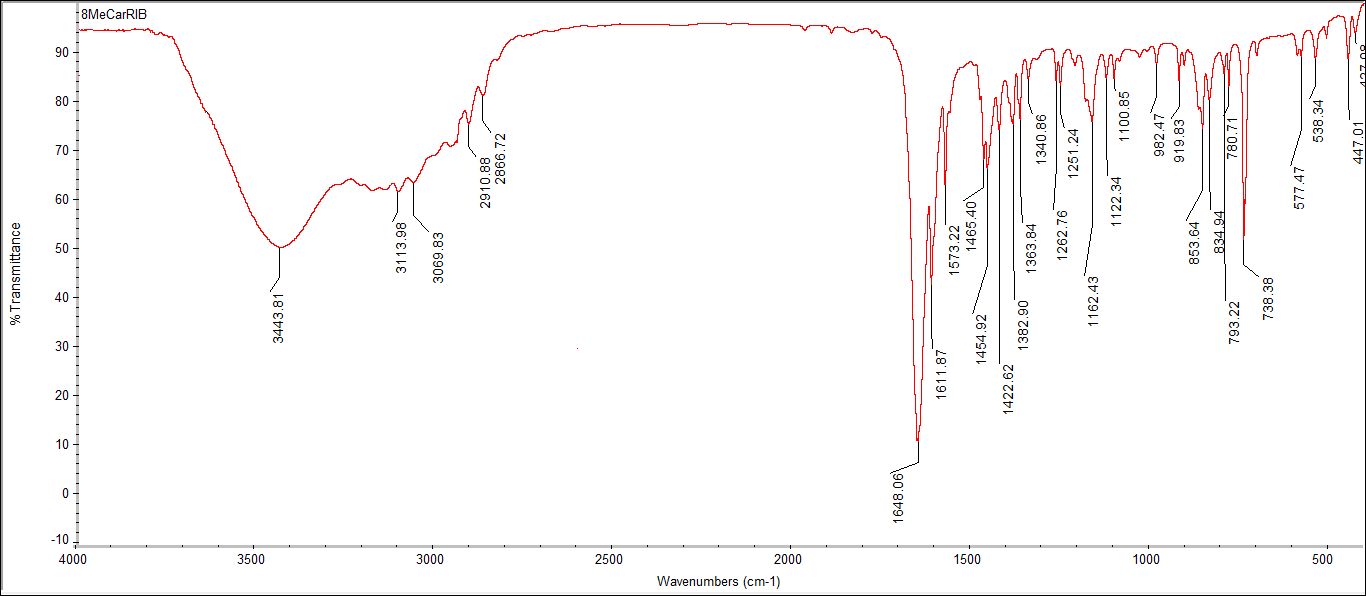
EI-MS of compound **4l**

FT-IR of the compound **4l**


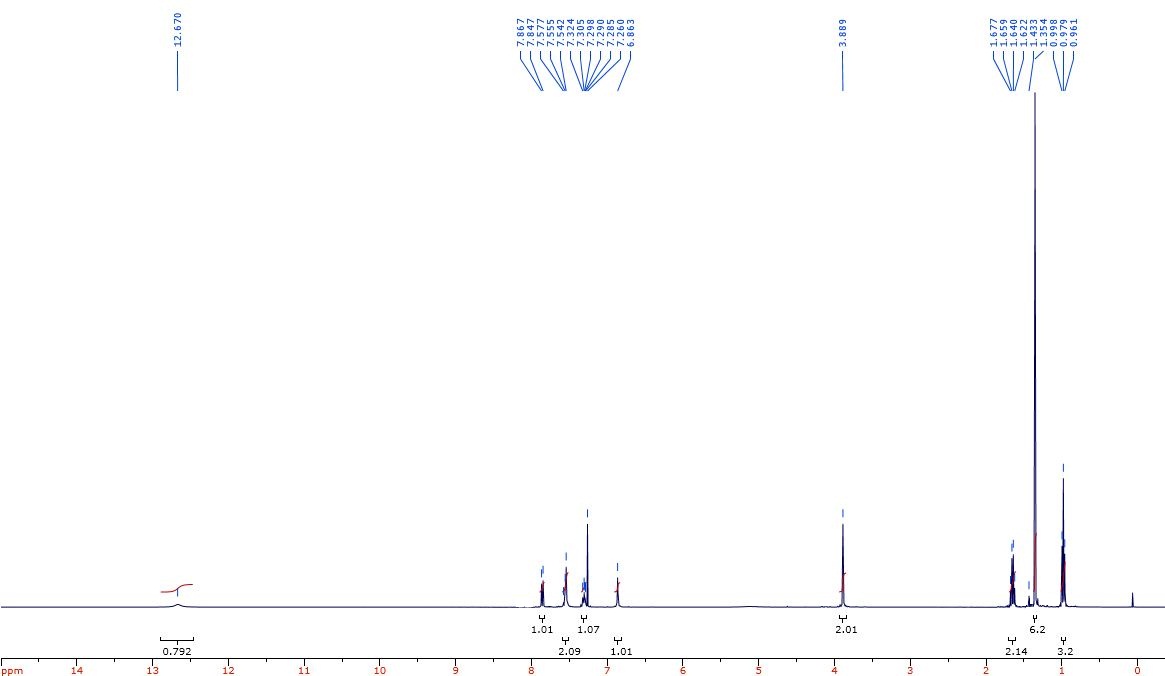


1H NMR of compound **4m**


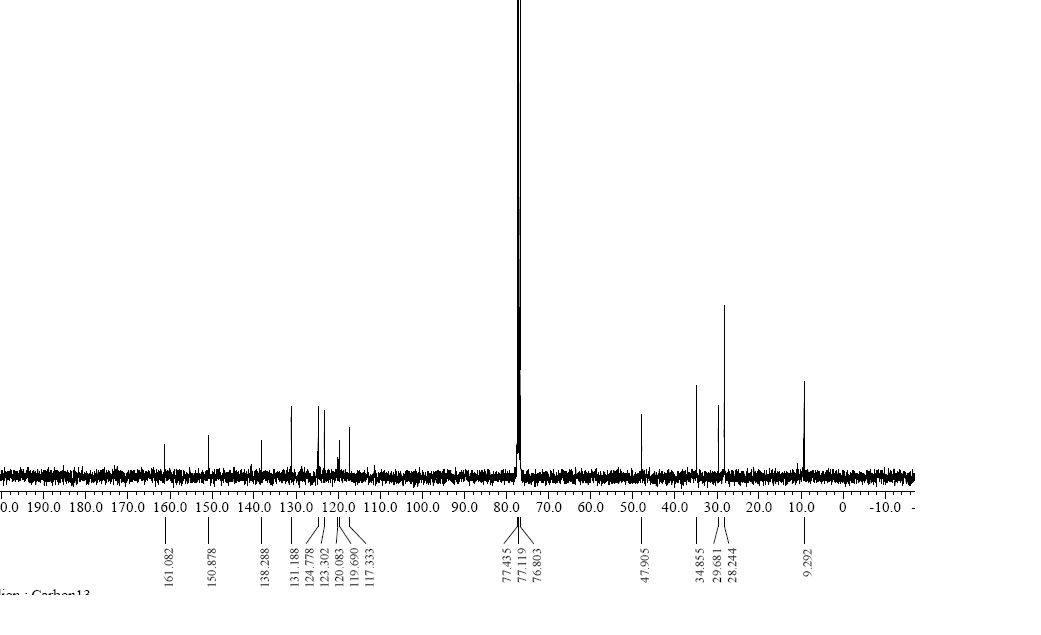


13C NMR of compound **4m**

EI-MS of compound **4m**


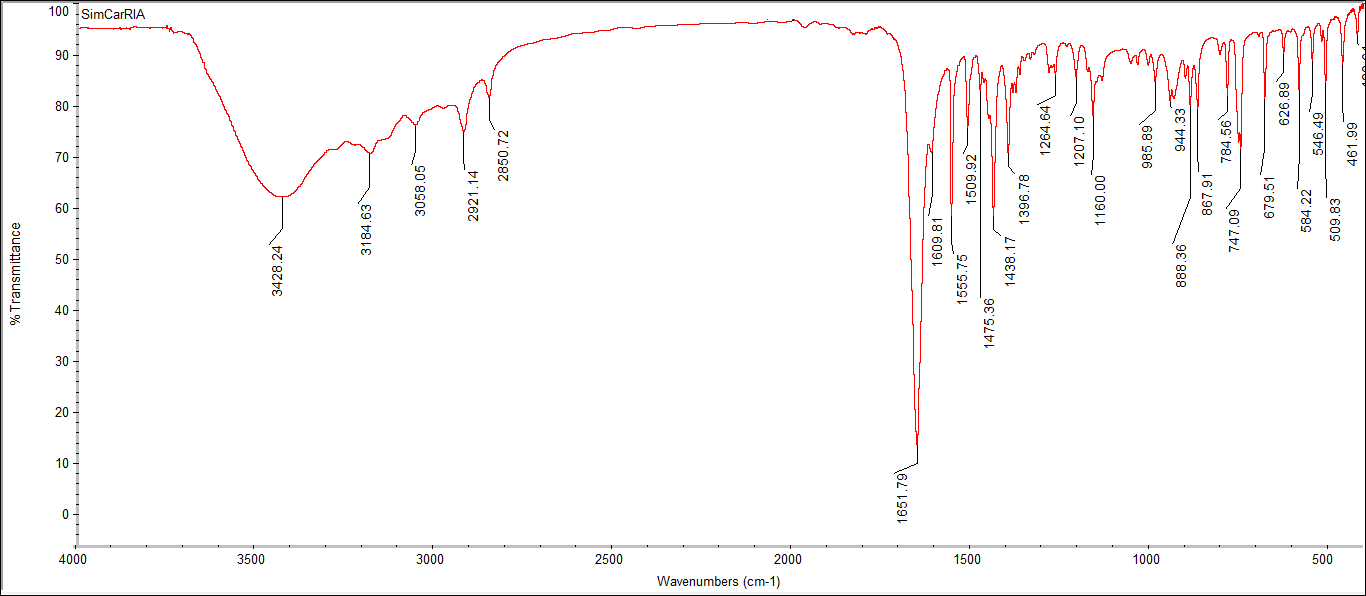
FT-IR of the compound **4m**


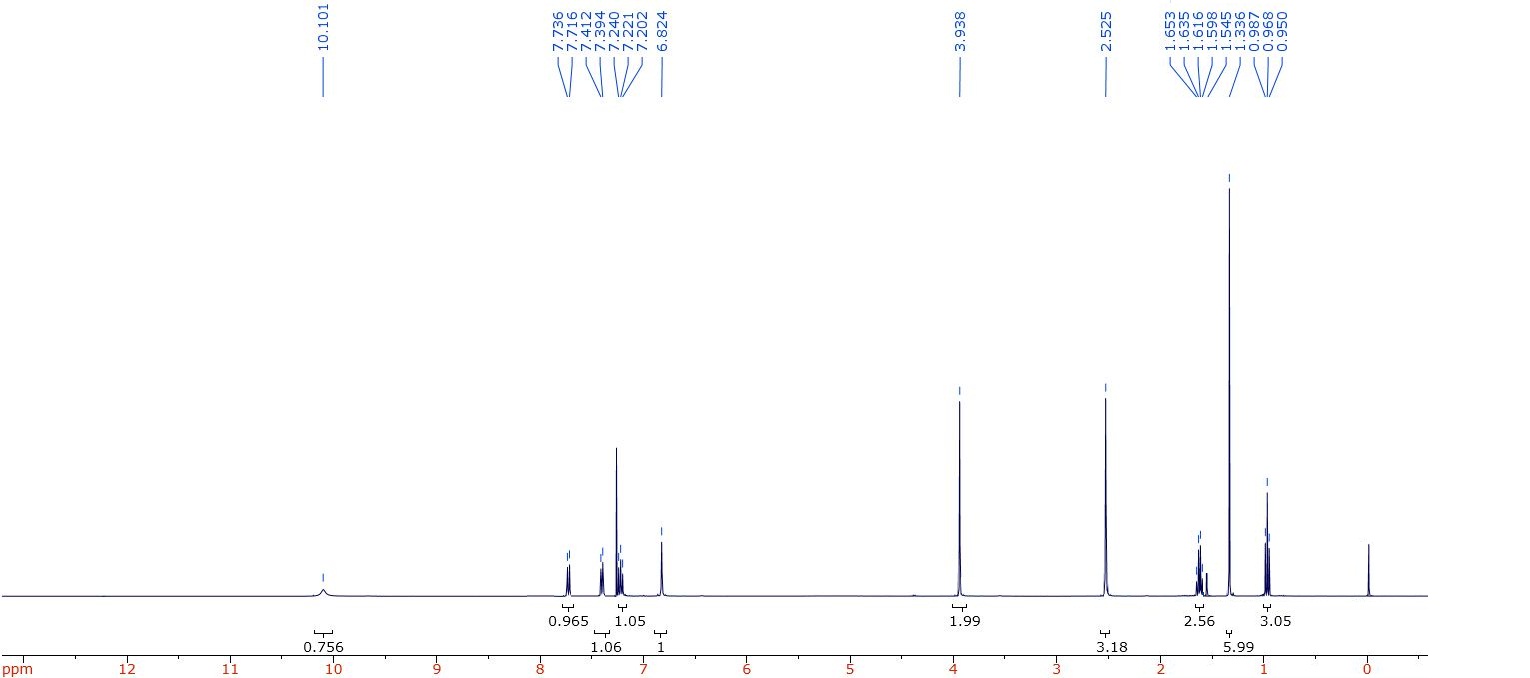


1H NMR of compound **4n**


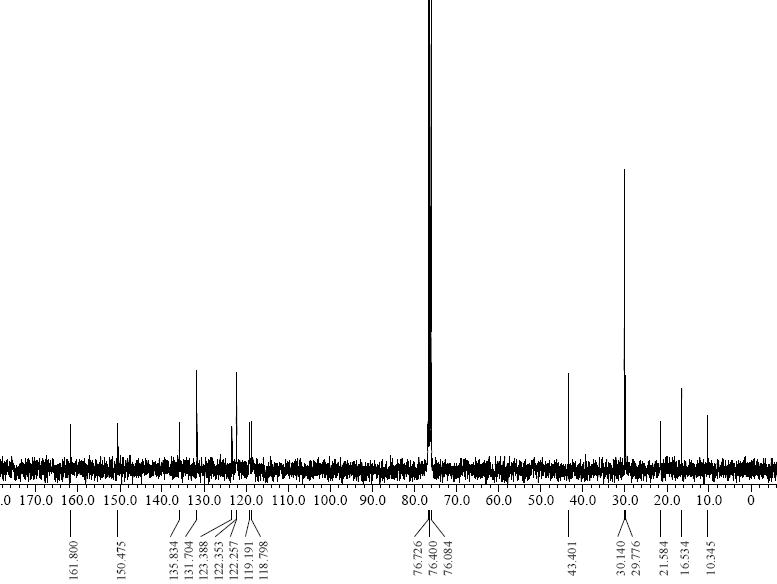


13C NMR of compound **4n**

EI-MS of compound **4n**


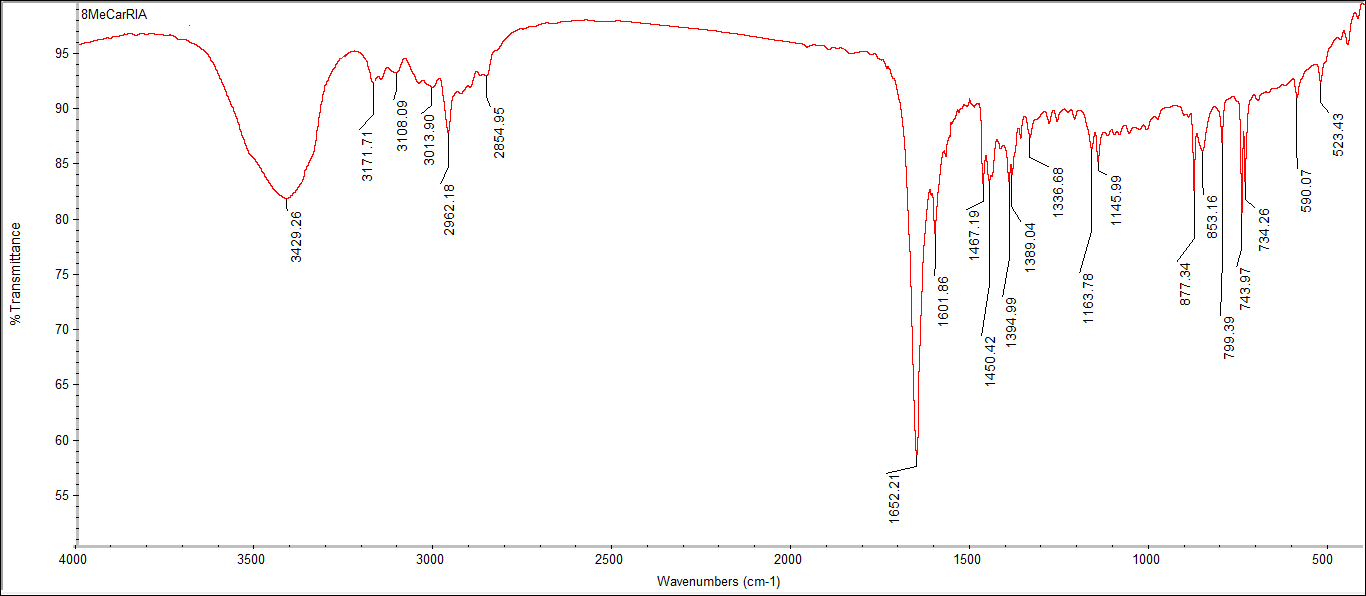
FT-IR of the compound **4n**

**Single Crystal X-ray diffraction Data of compound 4h**

Single crystals of **4h** were developed in aqueous ethanol. A suitable crystal was selected and mounted on a Bruker *SMART* CCD diffractometer.

**Table S-1: Experimental details**

|  | final2 |
| --- | --- |
| Crystal data | |
| Chemical formula | C16H20O3S |
| *M*r | 292.38 |
| Crystal system, space group | Triclinic, *P*¯1 |
| Temperature (K) | 296 |
| *a*, *b*, *c* (Å) | 7.2155 (19), 9.085 (2), 12.819 (3) |
| , ,  (°) | 104.788 (12), 104.494 (13), 92.660 (14) |
| *V* (Å3) | 781.2 (3) |
| *Z* | 2 |
| Radiation type | Mo *K* |
|  (mm-1) | 0.21 |
| Crystal size (mm) | 0.4 × 0.35 × 0.31 |
|  | |
| Data collection | |
| Diffractometer | Bruker *SMART* CCD area detector |
| Absorption correction | Multi-scan  (*SADABS*; Sheldrick, 2004) |
| *T*min, *T*max | 0.879, 0.905 |
| No. of measured, independent and  observed [*I* > 2(*I*)] reflections | 12085, 2911, 2323 |
| *R*int | 0.046 |
| (sin /)max (Å-1) | 0.606 |
|  | |
| Refinement | |
| *R*[*F*2 > 2(*F*2)], *wR*(*F*2), *S* | 0.103, 0.318, 1.06 |
| No. of reflections | 2911 |
| No. of parameters | 195 |
| No. of restraints | 85 |
| H-atom treatment | H-atom parameters constrained |
| max, min (e Å-3) | 1.47, -1.03 |

Computer programs: *SHELXS97* (Sheldrick, 1997), *SHELXL97* (Sheldrick, 1997), *ORTEP-3 for Windows* (Farrugia, 1997), *WinGX* publication routines (Farrugia, 1999).

**Table S-2: Selected geometric parameters (Å, º)**

| Bond Lengths | | | |
| --- | --- | --- | --- |
| S1—C11 | 1.821 (5) | C4—C9 | 1.440 (5) |
| S1—C12 | 1.829 (8) | C4—C11 | 1.498 (6) |
| O1—C2 | 1.367 (5) | C5—C6 | 1.366 (6) |
| O1—C1 | 1.385 (5) | C5—C9 | 1.411 (5) |
| O2—C2 | 1.202 (5) | C6—C7 | 1.389 (7) |
| O3—C6 | 1.373 (5) | C7—C8 | 1.372 (7) |
| O3—C10 | 1.412 (7) | C12—C14 | 1.521 (11) |
| C1—C8 | 1.377 (6) | C12—C15 | 1.5393 (11) |
| C1—C9 | 1.385 (6) | C12—C13 | 1.5398 (11) |
| C2—C3 | 1.440 (6) | C12—C13' | 1.5408 (11) |
| C3—C4 | 1.354 (6) | C15—C16 | 1.5389 (11) |
| Bond Angles | | | |
| C11—S1—C12 | 103.5 (3) | O3—C6—C7 | 116.1 (4) |
| C2—O1—C1 | 121.0 (3) | C8—C7—C6 | 120.5 (4) |
| C6—O3—C10 | 118.1 (4) | C7—C8—C1 | 118.8 (4) |
| C8—C1—O1 | 115.9 (4) | C1—C9—C5 | 118.1 (3) |
| C8—C1—C9 | 122.1 (4) | C1—C9—C4 | 118.6 (4) |
| O1—C1—C9 | 122.0 (3) | C5—C9—C4 | 123.4 (4) |
| O2—C2—O1 | 116.1 (4) | C4—C11—S1 | 107.4 (3) |
| O2—C2—C3 | 126.7 (4) | C14—C12—C15 | 111.3 (7) |
| O1—C2—C3 | 117.1 (3) | C14—C12—C13' | 108.1 (8) |
| C4—C3—C2 | 123.4 (4) | C15—C12—C13' | 109.5 (7) |
| C3—C4—C9 | 118.0 (4) | C14—C12—S1 | 104.8 (5) |
| C3—C4—C11 | 120.5 (4) | C15—C12—S1 | 114.1 (6) |
| C9—C4—C11 | 121.5 (3) | C13—C12—S1 | 120.3 (11) |
| C6—C5—C9 | 119.7 (4) | C13'—C12—S1 | 108.7 (8) |
| C5—C6—O3 | 123.2 (4) | C12—C15—C16 | 108.2 (6) |
| C5—C6—C7 | 120.7 (4) |  |  |
| Torsion Angles | | | |
| C2—O1—C1—C8 | 179.5 (4) | C8—C1—C9—C4 | -179.6 (4) |
| C2—O1—C1—C9 | -1.1 (6) | O1—C1—C9—C4 | 1.0 (6) |
| C1—O1—C2—O2 | -178.7 (4) | C6—C5—C9—C1 | 0.0 (6) |
| C1—O1—C2—C3 | 0.3 (6) | C6—C5—C9—C4 | -179.6 (4) |
| O2—C2—C3—C4 | 179.3 (5) | C3—C4—C9—C1 | -0.3 (6) |
| O1—C2—C3—C4 | 0.4 (6) | C11—C4—C9—C1 | 178.6 (4) |
| C2—C3—C4—C9 | -0.4 (6) | C3—C4—C9—C5 | 179.3 (4) |
| C2—C3—C4—C11 | -179.3 (4) | C11—C4—C9—C5 | -1.8 (6) |
| C9—C5—C6—O3 | 178.9 (4) | C3—C4—C11—S1 | 97.4 (4) |
| C9—C5—C6—C7 | -1.2 (7) | C9—C4—C11—S1 | -81.5 (4) |
| C10—O3—C6—C5 | -12.4 (7) | C12—S1—C11—C4 | 176.7 (3) |
| C10—O3—C6—C7 | 167.7 (5) | C11—S1—C12—C14 | 179.6 (4) |
| C5—C6—C7—C8 | 1.6 (7) | C11—S1—C12—C15 | -58.3 (6) |
| O3—C6—C7—C8 | -178.5 (4) | C11—S1—C12—C13 | 40.8 (11) |
| C6—C7—C8—C1 | -0.8 (7) | C11—S1—C12—C13' | 64.2 (7) |
| O1—C1—C8—C7 | 179.0 (4) | C14—C12—C15—C16 | 62.1 (9) |
| C9—C1—C8—C7 | -0.5 (7) | C13'—C12—C15—C16 | -178.4 (9) |
| C8—C1—C9—C5 | 0.8 (6) | S1—C12—C15—C16 | -56.3 (8) |
| O1—C1—C9—C5 | -178.6 (3) |  |  |

**Table S-3: Selected hydrogen-bond parameters**

| *D*—H···*A* | *D*—H (Å) | H···*A* (Å) | *D*···*A* (Å) | *D*—H···*A* (°) |
| --- | --- | --- | --- | --- |
| C3—H3···O3i | 0.93 | 2.52 | 3.416 (5) | 161.2 |
| C8—H8···O2ii | 0.93 | 2.55 | 3.429 (6) | 157.1 |
| C10—H10A···O2iii | 0.96 | 2.59 | 3.454 (7) | 149.3 |
| C10—H10B···O2iv | 0.96 | 2.62 | 3.407 (6) | 139.4 |
| C15—H15B···O1v | 0.97 | 2.66 | 3.617 (9) | 170 |
| C3—H3···O3i | 0.93 | 2.52 | 3.416 (5) | 161.2 |
| C8—H8···O2ii | 0.93 | 2.55 | 3.429 (6) | 157.1 |
| C10—H10A···O2iii | 0.96 | 2.59 | 3.454 (7) | 149.3 |
| C10—H10B···O2iv | 0.96 | 2.62 | 3.407 (6) | 139.4 |
| C15—H15B···O1v | 0.97 | 2.66 | 3.617 (9) | 170 |

Symmetry code(s): (i) *x*, *y*-1, *z*; (ii) -*x*, -*y*+1, -*z*+1; (iii) -*x*+1, -*y*+1, -*z*+1; (iv) *x*+1, *y*+1, *z*; (v) *x*+1, *y*, *z*.


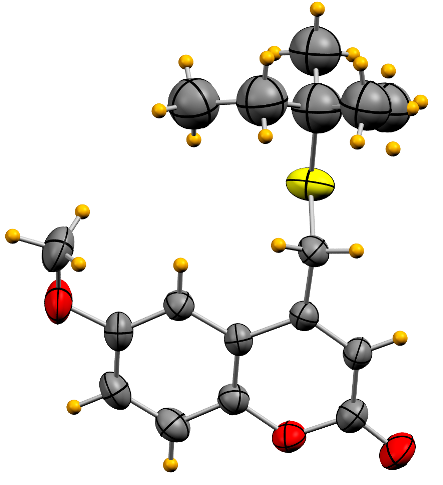


**Figure S-1**: Single crystal X-ray structure of **4h**

**
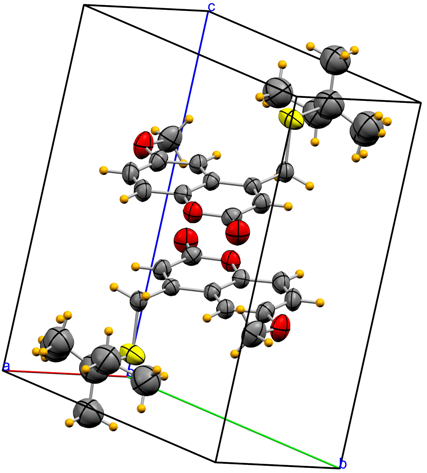
**

**Figure S-2**: Packing diagram of **4h**

**
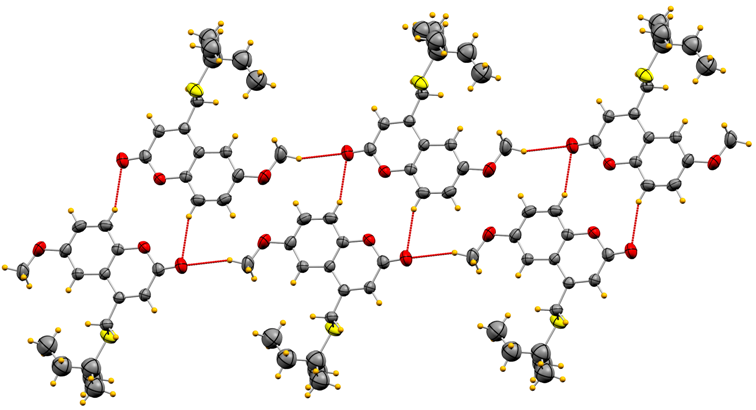
**

**Figure S-3**: H-bonding interaction in **4h**

**Fluorescence measurements:**

**Table S-4:** Fluorescence intensity of reaction mixtures with time

| **Time (Mins)** | **Fluorescence intensity of 360 nm band of thiocyanate 2a (R = -CH3) reaction mixture** | **Fluorescence intensity of 360 nm band of thiol 3a reaction mixture** |
| --- | --- | --- |
| 0.0 | 244 | 107 |
| 0.5 | 260 | 108.1 |
| 1.0 | 274 | 108.9 |
| 1.5 | 286 | 109.9 |
| 2.0 | 295 | 110.8 |
| 2.5 | 306 | 111.6 |
| 3.0 | 316 | 112 |
| 3.5 | 326 | 113 |
| 4.0 | 336 | 113.4 |
| 4.5 | 341 | 114.5 |
| 5.0 | 348 | 115 |
| 5.5 | 353 | 115.6 |
| 6.0 | 361 | 116.8 |
| 6.5 | 368 | 117.4 |
| 7.0 | 372 | 118.1 |
| 7.5 | 373 | 118.9 |
| 8.0 | 373.4 | 119.7 |
| 8.5 | 374.7 | 120.4 |
| 9.0 | 375.8 | 121.1 |
| 9.5 | 376.9 | 121.7 |
| 10.0 | 377.1 | 122.3 |
| 10.5 | 377.4 | 122.9 |
| 11.0 | 377.6 | 123.4 |
| 11.5 | 377.8 | 123.9 |
| 12.0 | 378.1 | 124.6 |
| 12.5 | --- | Same rate of increase in fluorescence intensity till 30 mins |


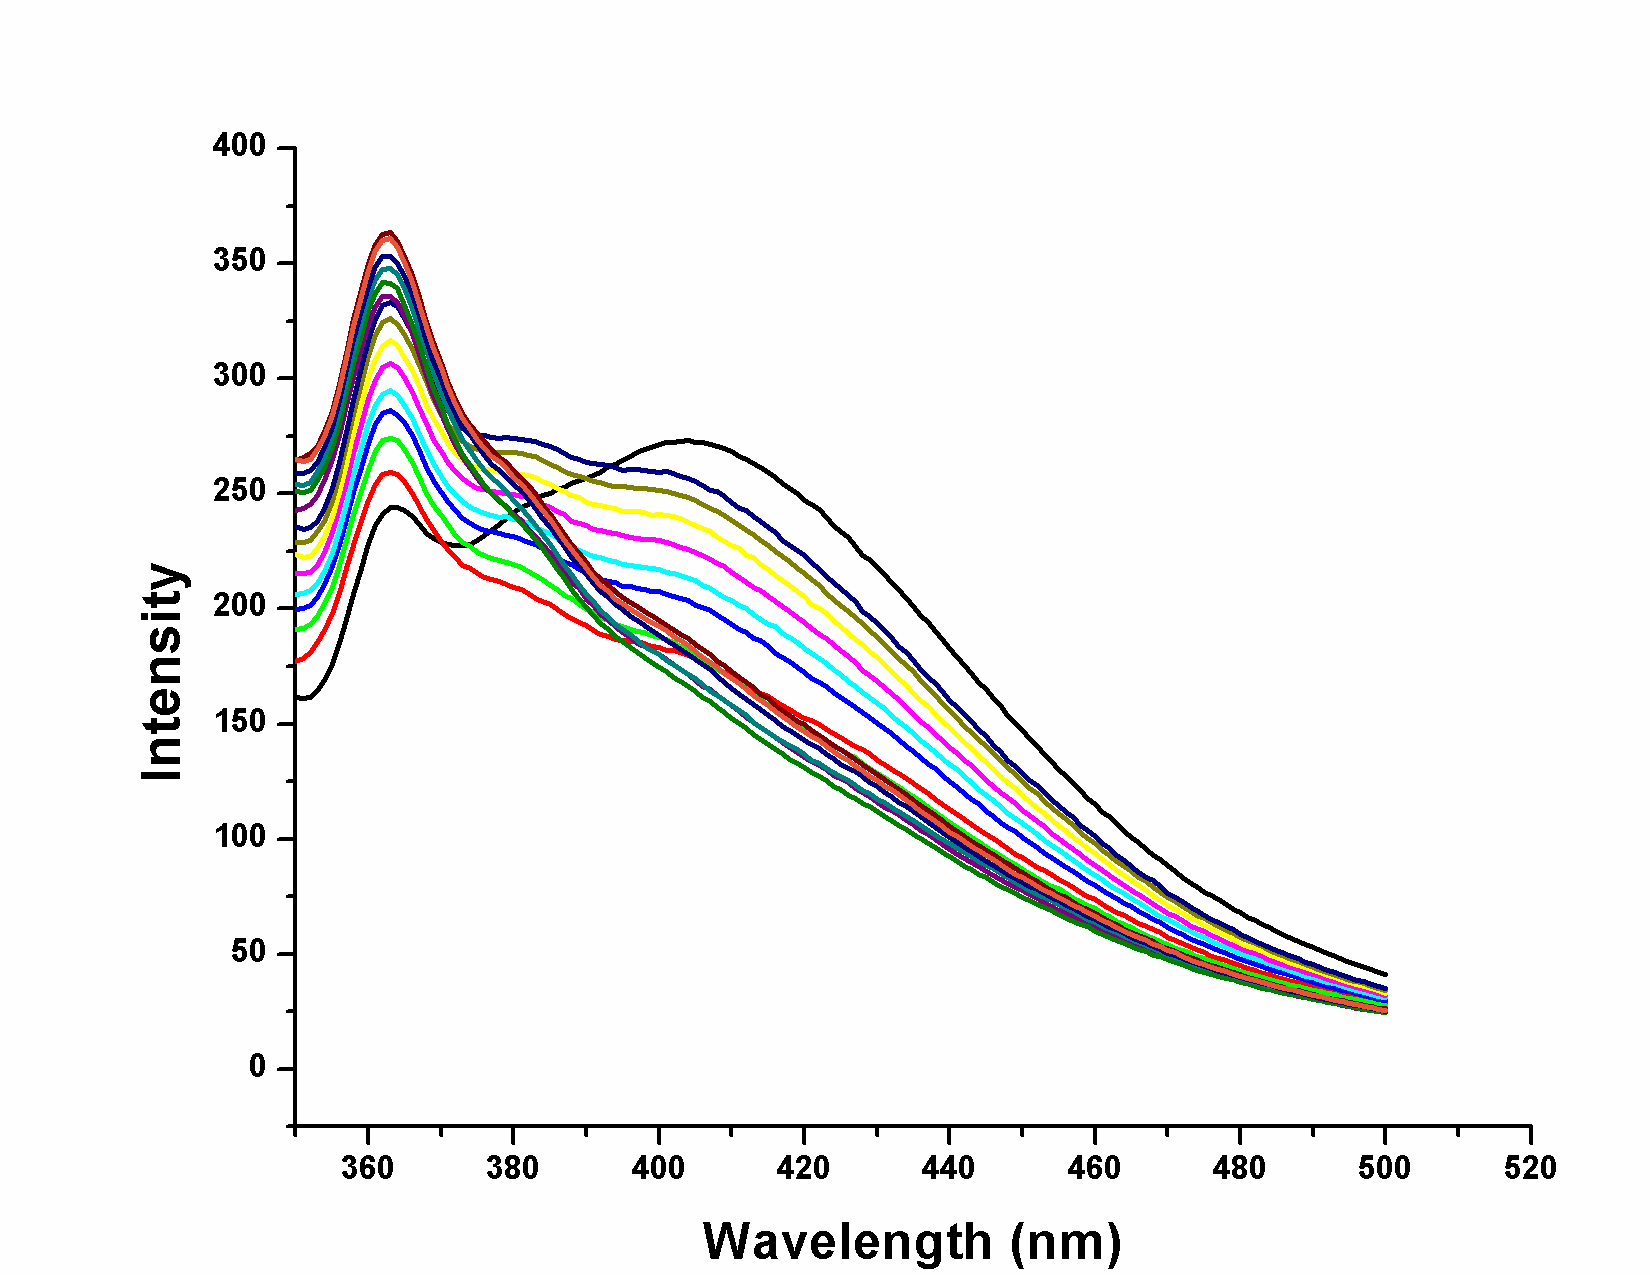


**Figure S-4:** Fluorescence spectra of thiocyanate **2a**,*t*-BuOH and H2SO4(pseudo first order reaction condition)reaction mixture recorded after every 30 secs shows an increase in the fluorescence intensity of band 360 nm and decrease of band around 410 nm.


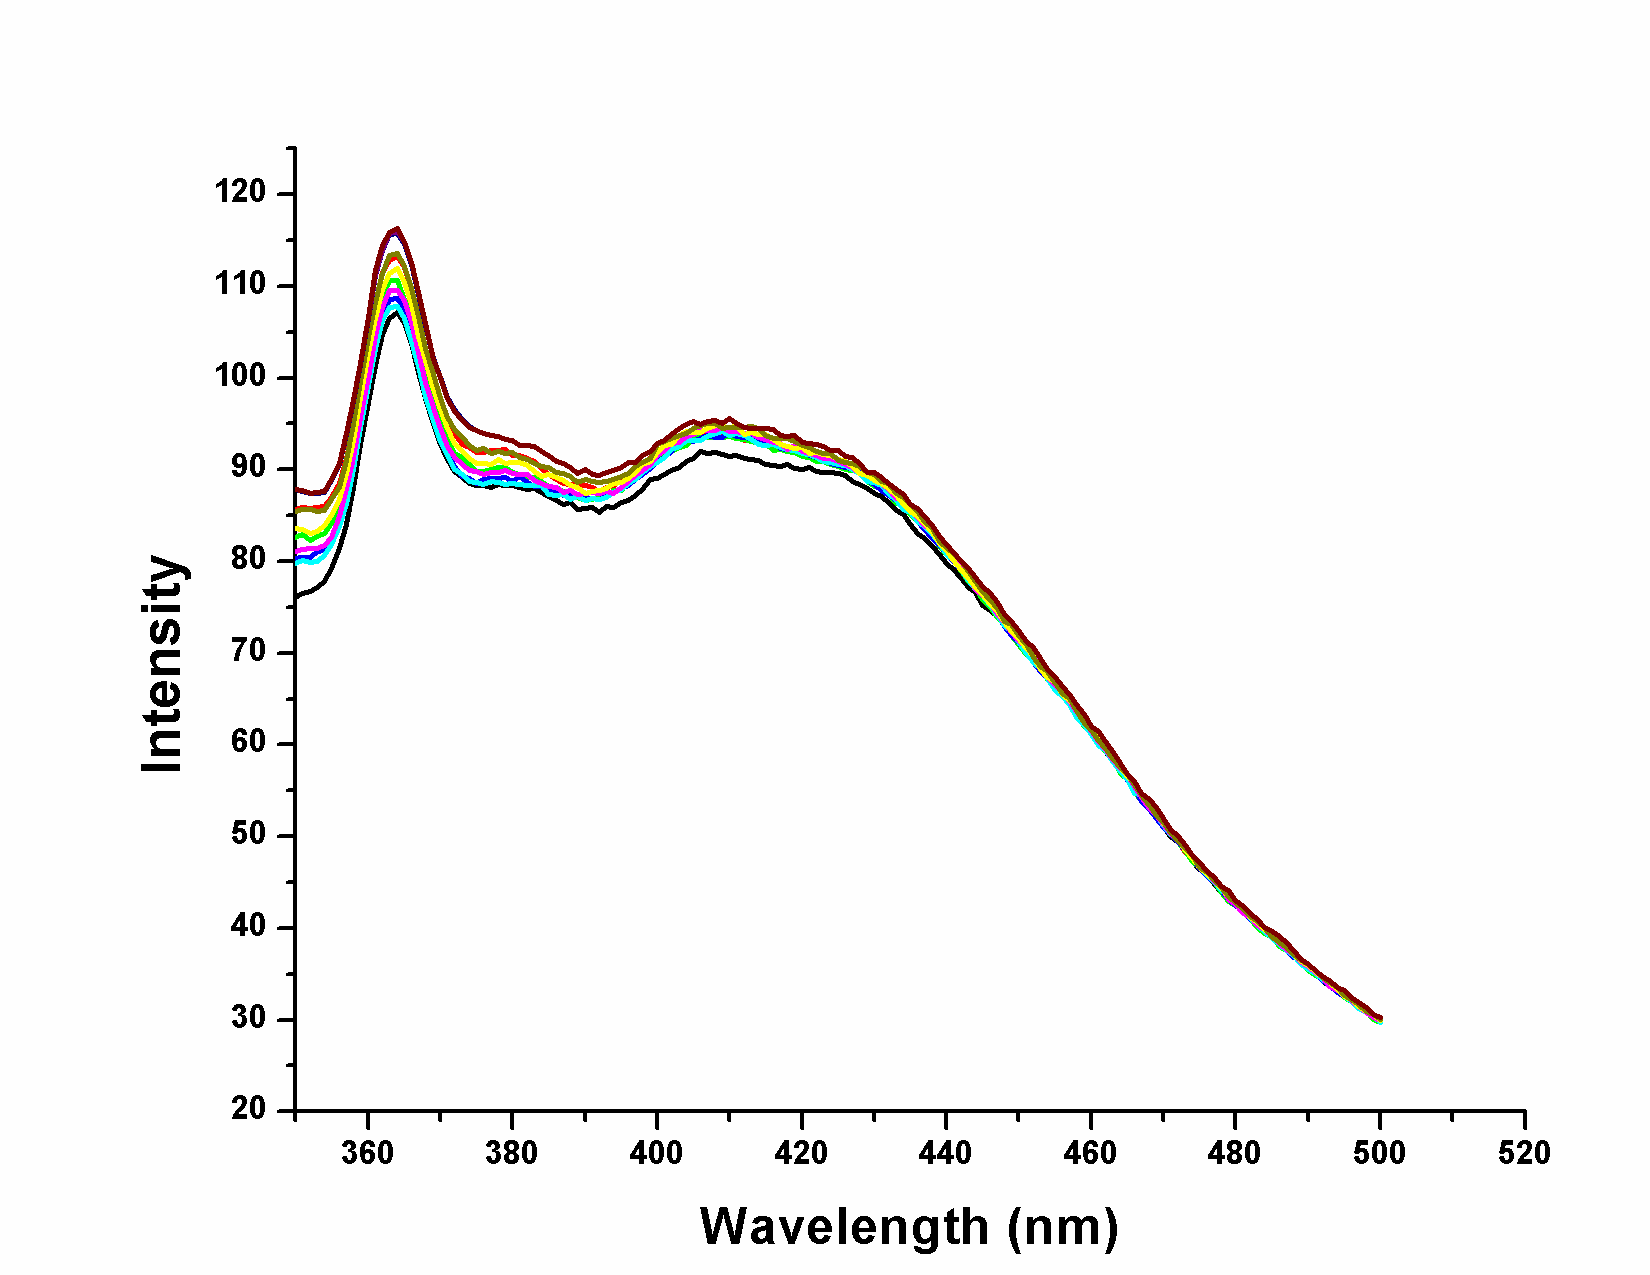


**Figure S-5:** Fluorescence spectra of thiol **3a**,*t*-BuOH and H2SO4(pseudo first order reaction condition)reaction mixture recorded after every 30 secs.
